# Supplementary material
Source: HighWire-hosted journal article supplement (https://bjgp.org/highwire/filestream/41214/field_highwire_adjunct_files/0/bjgp20X714161_suppl.pdf)
Supplement: bjgp20X714161_suppl.pdf [file bjgp20X714161_suppl.pdf]

## Supplementary material

**Table S1: Read codes for bariatric surgery for weight loss**

| Read code | Procedure                                                   |
|-----------|-------------------------------------------------------------|
| 7611      | Partial excision of stomach                                 |
| 7611100   | Partial gastrectomy & anastomosis stomach to transp jejunum |
| 7611200   | Partial gastrectomy and anastomosis stomach to jejunum NEC  |
| 7611400   | Sleeve gastrectomy and duodenal switch                      |
| 7611500   | Sleeve gastrectomy NEC                                      |
| 7611600   | Laparoscopic sleeve gastrectomy                             |
| 7611y00   | Other specified partial excision of stomach                 |
| 7611z00   | Partial excision of stomach NOC                             |
| 7613000   | Gastroplasty NEC                                            |
| 7613100   | Partitioning of stomach                                     |
| 7613111   | Mason vertical banded gastroplasty                          |
| 7613200   | Laparoscopic adjustable gastric banding                     |
| 7613300   | Partitioning of stomach using band                          |
| 7613400   | Partitioning of stomach using staples                       |
| 7613500   | Partitioning of stomach NEC                                 |
| 7613600   | Maintenance of gastric band                                 |
| 7615      | Connection of stomach to transposed jejunum                 |
| 7615000   | Bypass stomach by anastomosis stomach to transposed jejunum |
| 7615y00   | Other specified connection of stomach to transposed jejunum |
| 7615z00   | Connection of stomach to transposed jejunum NOS             |
| 7616      | Other connection of stomach to jejunum                      |
| 7616000   | Bypass of stomach by anastomosis of stomach to jejunum NEC  |
| 7616013   | Mason high gastric bypass                                   |
| 7616600   | Laparoscopic gastric bypass                                 |
| 7616y00   | Other specified other connection of stomach to jejunum      |
| 7616z00   | Other connection of stomach to jejunum NOS                  |
| 761H000   | Insertion of gastric bubble                                 |
| 761H011   | Insertion of gastric balloon                                |
| 761H100   | Attention to gastric bubble                                 |
| 761H400   | Removal of gastric balloon                                  |
| 761H411   | Removal of gastric bubble                                   |
| 761H500   | Insertion of gastric balloon                                |
| 761H600   | Attention to gastric balloon                                |
| 7622      | Bypass of duodenum                                          |
| 7622000   | Bypass of duodenum by anastomosis of stomach to jejunum     |
| 7622z00   | Bypass of duodenum NOS                                      |

|         |                               |
|---------|-------------------------------|
| 7642500 | Duodenal switch               |
| ZV45P00 | [V]Presence of gastric bypass |

**Table S2: Read codes for presence of blood tests/diagnoses**

| <b>ReadCodes</b> | <b>Folate</b>                                   |
|------------------|-------------------------------------------------|
| 42U2.00          | Serum folate low                                |
| 42U3.00          | Serum folate borderline                         |
| 42U8.00          | RBC folate low                                  |
| 42U9.00          | RBC folate borderline                           |
| 42UB.00          | Whole blood folate low                          |
| 42UC.00          | Whole blood folate borderline                   |
| 42UD.00          | RBC folate abnormal                             |
| C262000          | Folic acid deficiency                           |
| D012.00          | Folate-deficiency anaemia                       |
| D012.11          | Folic acid deficiency anaemia                   |
| D012100          | Folate-deficiency anaemia due to dietary causes |
| D012300          | Folate-deficiency anaemia due to malabsorption  |
| D012z00          | Folate-deficiency anaemia NOS                   |
| D013000          | Combined B12 and folate deficiency anaemia      |
| Dyu0300          | [X]Other folate deficiency anaemias             |
| 5774             | Folic acid radioimmunoassay                     |
| 5786             | Radiobioassay - folic acid                      |
| 42U..00          | Blood folate                                    |
| 42U..11          | Folate blood level                              |
| 42U1.00          | Serum folate normal                             |
| 42U4.00          | Red blood cell folate                           |
| 42U4.11          | Folate - RBC                                    |
| 42U5.00          | Serum folate                                    |
| 42U6.00          | Whole blood folate                              |
| 42U7.00          | RBC folate normal                               |
| 42UA.00          | Whole blood folate normal                       |
| 42UE.00          | Plasma folate level                             |
| 42UZ.00          | Blood folate NOS                                |
| 42YD.00          | B12/folate level                                |

| <b>ReadCodes</b> | <b>Calcium</b>                                 |
|------------------|------------------------------------------------|
| C293000          | Dietary calcium deficiency                     |
| C354.00          | Disorders of calcium metabolism                |
| C354000          | Hypocalcaemia NEC                              |
| C354600          | Hypocalcaemic tetany                           |
| C354900          | Calcium deficiency                             |
| C354y00          | Other specified disorder of calcium metabolism |
| C354z00          | Disorder of calcium metabolism NOS             |
| 44h4.00          | Blood calcium level                            |
| 44h7.00          | Plasma calcium level                           |

|         |                                       |
|---------|---------------------------------------|
| 44h9.00 | Plasma corrected calcium level        |
| 44h9000 | Plasma adjusted calcium concentration |
| 44I8.00 | Serum calcium                         |
| 44I8000 | Normal serum calcium level            |
| 44I8100 | Raised serum calcium level            |
| 44IC.00 | Corrected serum calcium level         |
| 44IC.11 | Adjusted serum calcium level          |
| 44IC000 | Serum adjusted calcium concentration  |
| 44ID.00 | Serum ionised calcium level           |
| 44IE.00 | Serum ionized calcium (pH 7.4) level  |
| 44ZR.00 | Calcium profile                       |
| 4Q72.00 | Calcium level                         |
| 4Q72100 | Calcium adjusted level                |

| <b>ReadCodes</b> | <b>Anaemia</b>                                       |
|------------------|------------------------------------------------------|
| 2C2..00          | O/E - anaemia                                        |
| 2C2Z.00          | O/E - anaemia NOS                                    |
| ByuHC00          | [X]Refractory anaemia, unspecified                   |
| D0...00          | Deficiency anaemias                                  |
| D00..11          | Hypochromic - microcytic anaemia                     |
| D00..12          | Microcytic - hypochromic anaemia                     |
| D00y100          | Microcytic hypochromic anaemia                       |
| D01..00          | Other deficiency anaemias                            |
| D01..11          | Megaloblastic anaemia                                |
| D012112          | Megaloblastic anaemia due to dietary causes          |
| D012500          | Macrocytic anaemia unspecified cause                 |
| D013z00          | Other specified megaloblastic anaemia NEC NOS        |
| D01y.00          | Other specified nutritional deficiency anaemia       |
| D01yy00          | Other specified other nutritional deficiency anaemia |
| D01yz00          | Other specified nutritional deficiency anaemia NOS   |
| D01z.00          | Other deficiency anaemias NOS                        |
| D01z.11          | Megaloblastic anaemia NOS                            |
| D01z000          | [X]Megaloblastic anaemia NOS                         |
| D0y..00          | Other specified deficiency anaemias                  |
| D0z..00          | Deficiency anaemias NOS                              |
| D21..00          | Other and unspecified anaemias                       |
| D21y.00          | Other specified anaemias                             |
| D21yy00          | Other specified other anaemia                        |
| D21yz00          | Other specified anaemia NOS                          |
| D21z.00          | Anaemia unspecified                                  |
| D21z.11          | Secondary anaemia NOS                                |
| D21z.12          | Normocytic anaemia due to unspecified cause          |
| D21z.13          | Macrocytic anaemia of unspecified cause              |
| D2y..00          | Other specified anaemias                             |
| D2z..00          | Other anaemias NOS                                   |
| Dyu0.00          | [X]Nutritional anaemias                              |

|         |                                                              |
|---------|--------------------------------------------------------------|
| Dyu0400 | [X]Other megaloblastic anaemias, not elsewhere classified    |
| Dyu0500 | [X]Anaem(nonmegaloblast)assoc+oth specfd nutrition deficiens |
| Dyu2200 | [X]Anaemia in other chronic diseases classified elsewhere    |
| 688..00 | Anaemia/blood screening                                      |
| 688..11 | Anaemia screen                                               |
| 6884    | Anaemia screen                                               |
| 688Z.00 | Anaemia/blood screen NOS                                     |
| 423..00 | Haemoglobin estimation                                       |
| 423..11 | Hb estimation                                                |
| 4232    | Haemoglobin requested                                        |
| 4233    | Haemoglobin - sample sent                                    |
| 4234    | Haemoglobin very low                                         |
| 4235    | Haemoglobin low                                              |
| 4236    | Haemoglobin borderline low                                   |
| 4237    | Haemoglobin normal                                           |
| 4238    | Haemoglobin borderline high                                  |
| 4239    | Haemoglobin high                                             |
| 423A.00 | Haemoglobin very high                                        |
| 423B.00 | Haemoglobin abnormal                                         |
| 423Z.00 | Haemoglobin estimation NOS                                   |
| 424..00 | Full blood count - FBC                                       |
| 4241    | Full blood count normal                                      |
| 4242    | Full blood count borderline                                  |
| 4243    | Full blood count abnormal                                    |
| 424Z.00 | Full blood count NOS                                         |

| <b>ReadCodes</b> | <b>Iron/ferritin</b>                          |
|------------------|-----------------------------------------------|
| 42R2.00          | Serum iron low                                |
| 42R4100          | Ferritin level low                            |
| 42R6.00          | Serum iron abnormal                           |
| C294300          | Iron deficiency                               |
| C350.00          | Disorders of iron metabolism                  |
| C350y00          | Other specified disorder of iron metabolism   |
| C350z00          | Disorder of iron metabolism NOS               |
| D00..00          | Iron deficiency anaemias                      |
| D001.00          | Iron deficiency anaemia due to dietary causes |
| D00y.00          | Other specified iron deficiency anaemia       |
| D00yz00          | Other specified iron deficiency anaemia NOS   |
| D00z.00          | Unspecified iron deficiency anaemia           |
| D00zz00          | Iron deficiency anaemia NOS                   |
| Dyu0000          | [X]Other iron deficiency anaemias             |
| 42d4.00          | Plasma ferritin level                         |
| 42d2.00          | Plasma iron level                             |

|         |                                  |
|---------|----------------------------------|
| 42R..00 | Serum iron tests                 |
| 42R..11 | Serum iron level                 |
| 42R1.00 | Serum iron normal                |
| 42R3.00 | Serum iron raised                |
| 42R4.00 | Serum ferritin                   |
| 42R4.11 | Ferritin - serum                 |
| 42R4200 | Serum ferritin normal            |
| 42R4300 | Serum ferritin high              |
| 42R7.00 | Serum iron level                 |
| 42RZ.00 | Serum iron tests NOS             |
| 4Q74.00 | Iron level                       |
| 6881    | Iron deficiency screen           |
| J69y700 | Malabsorption - iron             |
| R105200 | [D]Iron, blood level abnormal    |
| ZV78000 | [V]Screening for iron deficiency |

| <b>ReadCodes</b> | <b>Protein</b>                                               |
|------------------|--------------------------------------------------------------|
| 44M3100          | Serum total protein abnormal                                 |
| C20z.00          | Protein malnutrition unspecified                             |
| C20zX00          | Unspecified severe protein-energy malnutrition               |
| C22..00          | Other severe protein-calorie malnutrition (wt for age < 60%) |
| C23..00          | Other+unsp protein-calorie malnutrition (wt for age 60-89%)  |
| C230.00          | Moderate protein-calorie malnutrition (wt for age 60-74%)    |
| C231.00          | Mild protein-calorie malnutrition (wt for age 75-89%)        |
| C233.00          | Mild protein energy malnutrition                             |
| C234.00          | Moderate protein energy malnutrition                         |
| C23y.00          | Other protein-calorie malnutrition                           |
| C23z.00          | Protein-calorie malnutrition NOS                             |
| C2A0.00          | Sequelae of protein-energy malnutrition                      |
| D014.00          | Protein-deficiency anaemia                                   |
| D014z00          | Protein-deficiency anaemia NOS                               |
| J69y200          | Intestinal malabsorption of protein                          |
| 44M1.00          | Serum proteins normal                                        |
| 44M2.00          | Serum proteins low                                           |
| 44M3.00          | Serum total protein                                          |
| 44M3000          | Serum total protein normal                                   |
| 44M6.00          | Serum proteins borderline                                    |
| 44M7.00          | Plasma proteins normal                                       |
| 44M8.00          | Plasma proteins borderline                                   |
| 44M9.00          | Plasma proteins low                                          |
| 44MA.00          | Plasma total protein                                         |
| 44MV.00          | Serum protein profile                                        |
| 44MZ.00          | Serum proteins NOS                                           |
| 4Q3..00          | Protein level                                                |

|         |                                                              |
|---------|--------------------------------------------------------------|
| C20..00 | Kwashiorkor                                                  |
| C201.00 | Marasmic kwashiorkor                                         |
| C21..00 | Nutritional marasmus                                         |
| C33y000 | Hypoproteinaemia                                             |
| C33yy00 | Other specified other disorders of plasma protein metabolism |
| C33yz00 | Other disorders of plasma protein metabolism NOS             |
| C33z.00 | Disorder of plasma protein metabolism NOS                    |
| Cyu5000 | [X]Unspecified severe protein-energy malnutrition            |
| Ryu8400 | [X]Other specified abnormal findings of plasma proteins      |
| Ryu8500 | [X]Abnormal finding of plasma protein, unspecified           |
| 44C..12 | Protein - misc.- serum                                       |
| 44M..00 | Serum / plasma proteins                                      |

| <b>ReadCodes</b> | <b>Vitamin B12</b>                                          |
|------------------|-------------------------------------------------------------|
| 42T2.00          | Serum vitamin B12 low                                       |
| 42T3.00          | Serum vit B12 borderline                                    |
| 42TZ.00          | Serum vitamin B12 NOS                                       |
| 2126H00          | Vitamin B12 deficiency resolvd                              |
| 66E..00          | B12 deficiency monitoring                                   |
| 66E1.00          | B12 defic. initial assessment                               |
| 66E2.00          | B12 defic.follow-up assessment                              |
| 66E3.00          | B12 injections started                                      |
| 66E4.00          | B12 injections - at home                                    |
| 66E5.00          | B12 injections - at surgery                                 |
| 66E7.00          | B12 def.-dubious diag.criteria                              |
| 66EZ.00          | B12 defic. monitoring NOS                                   |
| 7L18500          | Intramuscular injection of vitamin B12                      |
| C262100          | Vitamin B12 deficiency                                      |
| D011.00          | Other vitamin B12 deficiency anaemias                       |
| D011.11          | Vitamin B12 deficiency anaemia                              |
| D011000          | Vitamin B12 deficiency anaemia due to dietary causes        |
| D011100          | Vit B12 defic anaemia due to malabsorption with proteinuria |
| D011X00          | Vitamin B12 deficiency anaemia, unspecified                 |
| D011z00          | Other vitamin B12 deficiency anaemia NOS                    |
| D013000          | Combined B12 and folate deficiency anaemia                  |
| Dyu0100          | [X]Other dietary vitamin B12 deficiency anaemia             |
| Dyu0200          | [X]Other vitamin B12 deficiency anaemias                    |
| Dyu0600          | [X]Vitamin B12 deficiency anaemia, unspecified              |
| F11x600          | Cerebral degeneration due to vitamin B12 deficiency         |
| 42T..00          | Serum vitamin B12                                           |
| 42T1.00          | Serum vitamin B12 normal                                    |
| 42TZ.00          | Serum vitamin B12 NOS                                       |
| 44Lc.00          | Vitamin B12 level                                           |
| 44Le.00          | Plasma vitamin B12 level                                    |

|         |                             |
|---------|-----------------------------|
| 5787    | Radiobioassay - vitamin B12 |
| 42YD.00 | B12/folate level            |
| 6882    | Vit B12 deficiency screen   |

| <b>ReadCodes</b> | <b>Vitamin D</b>                       |
|------------------|----------------------------------------|
| 66p..00          | Vitamin D deficiency monitoring        |
| 66p0.00          | Vitamin D deficiency annual review     |
| C28..00          | Vitamin D deficiency                   |
| C28z.00          | Avitaminosis D NOS                     |
| C2B..00          | Vitamin D insufficiency                |
| C384.00          | Hypervitaminosis D                     |
| 44LA.00          | Serum vitamin D                        |
| 44Lg.00          | Serum vitamin D2 level                 |
| 44LL.00          | Plasma 1,25-Dihydroxyvitamin D3 level  |
| 44LM.00          | Plasma 25-Hydroxyvitamin D3 level      |
| 44Ln.00          | Serum 25-Hydroxyvitamin D2 level       |
| 44LO.00          | Serum 1,25-dihydroxy vitamin D3 level  |
| 44LP.00          | Serum 25-Hydroxy vitamin D3 level      |
| 4QB4.00          | Vitamin D level                        |
| 4QB4000          | Vitamin D2 level                       |
| 4QB4100          | Vitamin D3 level                       |
| 4QB4200          | 25-Hydroxyvitamin D2 level             |
| 4QB4300          | 25-Hydroxyvitamin D3 level             |
| 4QB4400          | Combined total vitamin D2 and D3 level |
| 4QB4500          | 25-Hydroxyvitamin D level              |
| 4QB4600          | Total 25-hydroxyvitamin D level        |
| 4QB4700          | Serum total 25-hydroxy vitamin D level |
| 5788             | Radiobioassay - vitamin D              |

| <b>ReadCodes</b> | <b>Copper</b>                     |
|------------------|-----------------------------------|
| 44L4100          | Blood copper abnormal             |
| 44L4300          | Serum copper level abnormal       |
| R105100          | [D]Copper, blood level abnormal   |
| C294200          | Copper deficiency                 |
| C351.00          | Disorders of copper metabolism    |
| C351z00          | Disorder of copper metabolism NOS |
| 44L4.00          | Blood copper                      |
| 44L4.11          | Serum copper level                |
| 44L4000          | Blood copper normal               |
| 44L4200          | Serum copper level normal         |
| 44LF.00          | Serum copper level                |
| 44LJ.00          | Plasma copper level               |

|         |                            |
|---------|----------------------------|
| 44Lj.00 | Serum unbound copper level |
| 4Q73.00 | Copper level               |

| ReadCodes | Zinc                                             |
|-----------|--------------------------------------------------|
| 44L1100   | Serum zinc level low                             |
| R105600   | [D]Zinc, blood level abnormal                    |
| C294100   | Dietary zinc deficiency                          |
| C355.00   | Disorders of zinc metabolism                     |
| 44L1.00   | Blood zinc                                       |
| 44L1.11   | Serum zinc level                                 |
| 44L1000   | Serum zinc level normal                          |
| 44LG.00   | Serum zinc level                                 |
| 44LK.00   | Plasma zinc level                                |
| 44Z4.00   | Serum zinc protoporphyrin                        |
| 44ZM.00   | Blood zinc protoporphyrin level                  |
| 44ZM000   | Red blood cell zinc protoporphyrin concentration |
| 4Q78.00   | Zinc level                                       |

**Table S3: Read codes for nutritional supplement medications**

| DrugCodes | Multivitamins                                                    |
|-----------|------------------------------------------------------------------|
| 51851978  | Multivitamin liquid sugar free                                   |
| 82313979  | Multivitamin and mineral tablets                                 |
| 98664998  | Generic Ketovite liquid sugar free                               |
| 89621979  | Multivitamin tablets                                             |
| 88318998  | Vitamins c e & k with 8 other vitamins (combination no1) tablets |
| 86290998  | Vitamin c, e with minerals & lutein capsules                     |
| 89623979  | Multivitamin tablets                                             |
| 89627979  | Multivitamin tablets                                             |
| 73294978  | Generic healthy start children's vitamin drops                   |
| 89017998  | Vitamins a & d with other vitamins & minerals capsules           |
| 55032978  | Multivitamin and mineral tablets                                 |
| 84273978  | Multivitamin tablets                                             |
| 97924990  | Multivitamin tablets                                             |
| 82300979  | Multivitamin and mineral tablets                                 |
| 92029998  | Multivitamin and Mineral tablets                                 |
| 85243998  | Multivitamin and mineral capsules                                |
| 98017992  | Multivitamin and Mineral tablets                                 |
| 54402979  | Multivitamin and mineral chewable tablets                        |
| 89625979  | Multivitamin tablets                                             |
| 82410998  | Multivitamin and mineral tablets                                 |
| 94856998  | Multivitamins capsule                                            |
| 89297997  | Multivitamins with iron tablet                                   |
| 98289992  | Multivitamin tablets                                             |
| 98015992  | Multivitamin and Mineral tablets                                 |

|          |                                                                                 |
|----------|---------------------------------------------------------------------------------|
| 89724998 | Vitamin c with vitamins & minerals capsules                                     |
| 82322979 | Multivitamin and mineral tablets                                                |
| 90937998 | Vitamins a & d with 5 minerals (combination 1) liquid                           |
| 93647996 | Multivitamins with minerals tablet                                              |
| 37532978 | Multivitamin and mineral tablets                                                |
| 84107978 | Multivitamin and mineral tablets                                                |
| 62937979 | Multivitamin liquid                                                             |
| 86292998 | Multivitamin and mineral tablets                                                |
| 89922998 | Multivitamins with soya flour extract, vitamins and minerals tablet             |
| 82229978 | Generic littlevit multivitamin drops                                            |
| 89882998 | Vitamin a with vitamins c & d sf oral drops                                     |
| 98993998 | Vitamin a, c & d with 11 other vitamins & 17 minerals (combination no1) tablets |
| 96405990 | Vitamins capsules                                                               |
| 90213998 | Ferrous fumarate with vitamins and nicotinic acid tablet                        |
| 98420998 | Vitamins capsules                                                               |
| 85238998 | Multivitamin and mineral capsules                                               |
| 88933998 | Calcium carbonate with multivitamins, iron and cod liver oil capsules           |
| 94373996 | Multivitamins oral solution                                                     |
| 94372998 | Multivitamins pellet                                                            |
| 91143998 | Calcium carbonate with multivitamins with iron chewable tablets                 |
| 81525979 | Multivitamin and mineral chewable tablets                                       |
| 94368998 | Multivitamin tablets                                                            |
| 90921998 | Multivitamin and mineral chewable tablets sugar free                            |
| 82312979 | Multivitamin and mineral tablets                                                |
| 62936979 | Multivitamin liquid                                                             |
| 83262998 | Multivitamin and mineral capsules                                               |
| 71893979 | Multivitamin and mineral capsules                                               |
| 91820998 | Multivitamins with minerals, trace elements and co-factors capsule              |
| 89874998 | Ascorbic acid with calcium with vitamin b complex effervescent tablets          |
| 92016998 | Multivitamin and mineral capsules                                               |
| 89752998 | Vitamin c with vitamins, minerals & other ingredients tablets                   |
| 92019998 | Multivitamins with minerals and herb extracts capsule                           |
| 90812998 | Multivitamin and mineral chewable tablets                                       |
| 82325979 | Multivitamin and mineral tablets                                                |
| 89918998 | Ascorbic acid with vitamin e and beta carotene capsules                         |
| 55863979 | Generic forceval soluble junior tablets sugar free                              |
| 85359978 | Multivitamin and mineral capsules                                               |
| 95438990 | Vitamins capsules                                                               |
| 71895979 | Multivitamin and mineral capsules                                               |
| 58399979 | Multivitamin and mineral chewable tablets                                       |
| 89622979 | Multivitamin tablets                                                            |
| 97987992 | Redoxon multivitamin tab                                                        |
| 82314979 | Multivitamin and mineral tablets                                                |
| 91819998 | Folic acid with multivitamins and minerals capsule                              |
| 98121990 | Multivitamin tablets                                                            |
| 82323979 | Multivitamin and mineral tablets                                                |

|          |                                                                                 |
|----------|---------------------------------------------------------------------------------|
| 71888979 | Multivitamin and mineral capsules                                               |
| 91550998 | Folic acid with multivitamins and minerals capsule                              |
| 94044997 | Multivitamins with minerals and trace elements capsule                          |
| 98381990 | Vitamins capsules                                                               |
| 93647998 | Multivitamin and mineral capsules                                               |
| 82306979 | Multivitamin and mineral tablets                                                |
| 71890979 | Multivitamin and mineral capsules                                               |
| 92163998 | Multivitamins with minerals and trace elements tablet                           |
| 83446998 | Generic forceval junior capsules                                                |
| 71894979 | Multivitamin and mineral capsules                                               |
| 89634979 | Multivitamin tablets                                                            |
| 92750998 | Multivitamins granules                                                          |
| 53463978 | Multivitamin liquid                                                             |
| 98668998 | Multivitamins oral solution                                                     |
| 88827998 | Vitamin a, c & d with 11 other vitamins & 1 mineral (combination no1) tabs      |
| 89632979 | Multivitamin tablets                                                            |
| 99039990 | Vitamins capsules                                                               |
| 83544978 | Multivitamin tablets                                                            |
| 91802998 | Vitamin a, c & d with 11 other vitamins & 17 minerals (combination no1) tablets |
| 89636979 | Multivitamin tablets                                                            |
| 98291992 | Vitaminorum tab                                                                 |
| 99471998 | Multivitamins with multiminerals capsule                                        |
| 89828997 | Multivitamin and mineral chewable tablets                                       |
| 81798998 | Multivitamin and mineral liquid sugar free                                      |
| 88233979 | Generic abidec multivitamin drops                                               |
| 71901979 | Multivitamin and mineral capsules                                               |
| 82041979 | Multivitamin chewable tablets                                                   |
| 89296998 | Multivitamins with iron chewable tablet                                         |
| 85358978 | Multivitamin and mineral capsules                                               |
| 89635979 | Multivitamin tablets                                                            |
| 55099979 | Multivitamin and mineral capsules                                               |
| 84126998 | Multivitamin tablets                                                            |
| 98290992 | Vitamins capsules                                                               |
| 82298979 | Multivitamin and mineral tablets                                                |
| 82310979 | Multivitamin and mineral tablets                                                |
| 93276998 | Generic Abidec Multivitamin drops                                               |
| 82305979 | Multivitamin and mineral tablets                                                |
| 71889979 | Multivitamin and mineral capsules                                               |
| 82297979 | Multivitamin and mineral tablets                                                |
| 84932998 | Multivitamin and mineral capsules                                               |
| 90874998 | Vitamin c with 4 other vitamins (combination no1) tablets                       |
| 82039979 | Multivitamin effervescent tablets sugar free                                    |
| 90787998 | Vitamins b complex & c with folic acid & zinc tablets                           |
| 82315979 | Multivitamin and mineral tablets                                                |
| 89631979 | Multivitamin tablets                                                            |
| 83263998 | Vitamin c, e & b3 with minerals & lutein capsules                               |

|          |                                                                                       |
|----------|---------------------------------------------------------------------------------------|
| 94372997 | Multivitamins oral drops                                                              |
| 91823998 | Multivitamin chewable tablets                                                         |
| 82318979 | Multivitamin and mineral tablets                                                      |
| 89754998 | Vitamin c with vitamins, minerals & other ingredients tablets                         |
| 71892979 | Multivitamin and mineral capsules                                                     |
| 82411998 | Multivitamin and mineral tablets                                                      |
| 89198998 | Vitamins b complex & c with folic acid tablets                                        |
| 92055998 | Multivitamins with minerals and herb extracts capsule                                 |
| 82321979 | Multivitamin and mineral tablets                                                      |
| 53479978 | Multivitamin and mineral capsules                                                     |
| 89506998 | Calcium carbonate with multivitamins with iron chewable tablets                       |
| 55860979 | Generic forceval soluble tablets sugar free                                           |
| 89725998 | Vitamin c with vitamins & minerals capsules                                           |
| 81747998 | Vitamin a, c & e with minerals (zinc & copper) capsules                               |
| 98420997 | Multivitamin tablets                                                                  |
| 94373997 | Multivitamin tablets                                                                  |
| 95373992 | Vitamins B and C high potency intravenous solution for injection 5ml and 5ml ampoules |
| 82311979 | Multivitamin and mineral tablets                                                      |
| 82304979 | Multivitamin and mineral tablets                                                      |
| 95972990 | Vitamins capsules                                                                     |
| 88824998 | Vitamin a, c & d with 11 other vitamins & 1 mineral (combination no1) tabs            |
| 55862979 | Generic forceval soluble junior tablets sugar free                                    |
| 89742998 | Zinc with vitamins tablets                                                            |
| 92611998 | Multivitamins with multiminerals capsule                                              |
| 94263998 | Multivitamins with iron tablet                                                        |
| 64456979 | Vitamins capsules                                                                     |
| 87044979 | Generic ketovite tablets                                                              |
| 71897979 | Multivitamin and mineral capsules                                                     |
| 88932998 | Calcium carbonate with multivitamins with iron with evening primrose oil capsules     |
| 55861979 | Generic forceval soluble tablets sugar free                                           |
| 88934998 | Calcium carbonate with multivitamins, iron and cod liver oil capsules                 |
| 94044998 | Generic Forceval capsules                                                             |
| 89633979 | Multivitamin tablets                                                                  |
| 97935998 | Generic Abidec Multivitamin drops                                                     |
| 94373998 | Multivitamin tablets                                                                  |
| 99308997 | Multivitamins oral solution                                                           |
| 92551998 | Multivitamins powder for solution for injection                                       |
| 99593998 | Multivitamin and mineral capsules                                                     |
| 89624979 | Multivitamin tablets                                                                  |
| 90498998 | Nicotinic acid with coledalciferol and calcium gluconate tablet                       |
| 81339998 | Vitamin a, c & d with multivitamins & minerals tablets                                |
| 82299979 | Multivitamin and mineral tablets                                                      |
| 86600998 | Vitamin a, c & d with 10 other vitamins & zinc (combination 1) drops                  |
| 99508998 | Generic Ketovite tablets                                                              |
| 82319979 | Multivitamin and mineral tablets                                                      |

|          |                                                                                       |
|----------|---------------------------------------------------------------------------------------|
| 89297998 | Multivitamins with iron chewable tablet                                               |
| 82966978 | Multivitamin and mineral capsules                                                     |
| 93753998 | Multivitamins oral solution                                                           |
| 99308998 | Multivitamin tablets                                                                  |
| 87072979 | Generic Forceval capsules                                                             |
| 86995998 | Ferrous sulphate with folic acid, ascorbic acid and b group vitamins capsule          |
| 97186990 | Multivitamin tablets                                                                  |
| 55411979 | Multivitamin and mineral tablets                                                      |
| 98974998 | Multivitamins oral solution                                                           |
| 84175998 | Multivitamin and mineral capsules                                                     |
| 81652998 | Multivitamin and mineral capsules                                                     |
| 92240998 | Multivitamins with minerals and trace elements (50with) tablet                        |
| 96155992 | Choline chloride /cyanocobalamin /vitami 150 mg liq                                   |
| 91506998 | Vitamin a, c & d with 4 other vitamins (combination no2) oral solution                |
| 89735998 | Zinc with vitamins tablets                                                            |
| 97232998 | Multivitamins with minerals and trace elements (50with) tablet                        |
| 84097978 | Multivitamin and mineral capsules                                                     |
| 89756998 | Multivitamin liquid sugar free                                                        |
| 84098978 | Multivitamin and mineral capsules                                                     |
| 99733992 | Ascorbic acid/vitamin a/vitamin d 2 25 mg tab                                         |
| 99390998 | Multivitamins pellet                                                                  |
| 93838998 | Multivitamins sugar free liquid                                                       |
| 89119998 | Multivitamins with minerals and trace elements sugar free chewable tablet             |
| 91095998 | Multivitamins with minerals, trace elements and co-factors capsule                    |
| 93646996 | Multivitamins with minerals and trace elements tablet                                 |
| 97951990 | Vitamins capsules                                                                     |
| 71887979 | Multivitamin and mineral capsules                                                     |
| 97415998 | Ferrous sulphate with multivitamins and minerals tablet                               |
| 94042998 | Ferrous fumarate with ascorbic acid, b group vitamins and low dose folic acid capsule |
| 98303992 | Vitamins a/b1/b2/b6/b12/c/d/e/ferr.fum/f tab                                          |
| 82309979 | Multivitamin and Mineral tablets                                                      |
| 94264998 | Multivitamins with iron tablet                                                        |
| 86293998 | Vitamin a, c & e with minerals tablets                                                |
| 86289998 | Multivitamin and mineral capsules                                                     |
| 64827979 | Multivitamin pastilles                                                                |
| 98670998 | Multivitamins capsule                                                                 |
| 85239998 | Vitamin a, c & e with zinc, copper & lutein capsules                                  |
| 93466992 | Seven seas (folic plus vit b12) cap                                                   |
| 86993998 | Ferric ammonium citrate with glycerophosphates and b group vitamins oral suspension   |
| 84935998 | Vitamin c & e with zinc, copper & lutein capsules                                     |
| 71891979 | Multivitamin and mineral capsules                                                     |
| 98610990 | Vitamins capsules                                                                     |
| 85085998 | Multivitamins with minerals, trace elements and ginseng capsule                       |
| 82316979 | Multivitamin and mineral tablets                                                      |

|          |                                                         |
|----------|---------------------------------------------------------|
| 93646998 | Multivitamins with minerals and trace elements capsule  |
| 89629979 | Multivitamin tablets                                    |
| 87618998 | Vitamin a, c & e with other vitamins & minerals tablets |
| 93646997 | Multivitamins with minerals and trace elements capsule  |
| 89741998 | Vitamins a & d with other vitamins capsules             |
| 89737998 | Ascorbic acid with other vitamins tablets               |
| 91623998 | Multivitamin and mineral tablets                        |
| 96016992 | Vita plus + iron tab                                    |
| 99973998 | Multivitamins capsule                                   |
| 82042979 | Multivitamin tablets                                    |

| <b>Drug Code</b> | <b>Calcium</b>                                                                             |
|------------------|--------------------------------------------------------------------------------------------|
| 92145979         | Calcium carbonate 1.25g chewable tablets sugar free                                        |
| 97066992         | Calcium + vitamin c tab                                                                    |
| 96300998         | Calcium carbonate co paediatric mixture                                                    |
| 99158998         | Calcium compound 400mg(10mmol) effervescent tablets                                        |
| 92150979         | Calcium lactate 300mg tablets                                                              |
| 93613998         | Calcium carbonate 1.25g effervescent tablets sugar free                                    |
| 55918979         | Calcium carbonate 250mg dispersible tablets                                                |
| 92232998         | Calcium amino acid chelate 200mg tablets                                                   |
| 92142979         | Calcium carbonate 1.25g chewable tablets sugar free                                        |
| 98198990         | Calcium lactate 300mg tablets                                                              |
| 96135992         | Calcium carbimide citrated 50 mg tab                                                       |
| 92147979         | Calcium carbonate 1.25g chewable tablets sugar free                                        |
| 79147979         | Calcium carbonate 500mg capsules                                                           |
| 80895979         | Calcium carbonate 125mg/5ml oral suspension                                                |
| 83457998         | Calcium lactate gluconate 2.263g / Calcium carbonate 1.75g effervescent tablets sugar free |
| 97056992         | Calcium gluconate 500 mg tab                                                               |
| 96067992         | B13 calcium orotate 500 mg tab                                                             |
| 97218998         | Calcium gluconate 1g effervescent tablets                                                  |
| 63621979         | Calcium carbonate 300mg capsules                                                           |
| 90334998         | Calcium carbonate 800mg chewable tablets                                                   |
| 98721990         | Calcium carbonate powder                                                                   |
| 97053992         | Calcium lactate 200 mg tab                                                                 |
| 94801998         | Calcium carbonate 680mg / magnesium carbonate heavy 80mg chewable tablets sugar free       |
| 92659998         | Calcium carbonate 500mg chewable tablets                                                   |
| 88189998         | Calcium amino acid chelate 200mg tablets                                                   |
| 78390979         | Calcium carbonate 680mg / magnesium carbonate heavy 80mg chewable tablets                  |
| 84748998         | Calcium carbonate 800mg chewable tablets                                                   |
| 85387978         | Calcium carbonate 500mg chewable tablets                                                   |
| 68506979         | Calcium carbonate 5mg/5ml oral suspension                                                  |
| 94480998         | Calcium carbonate 2.5g/sachet granules                                                     |
| 62945979         | Calcium 600mg chewable tablets                                                             |
| 90095998         | Calcium pantothenate 500mg tablets                                                         |

|          |                                                                           |
|----------|---------------------------------------------------------------------------|
| 78391979 | Calcium carbonate 680mg / magnesium carbonate heavy 80mg chewable tablets |
| 97055992 | Calcium gluconate 300 mg tab                                              |
| 96603992 | Calcium 500 mg cap                                                        |
| 97008992 | Calcium carbonate 1.25g effervescent tablets sugar free                   |
| 81835979 | Calcium carbonate 166.67mg tablets                                        |
| 97047992 | Calcium b13 (orotate) 500 mg tab                                          |
| 96893998 | Calcium carbonate 250mg tablets                                           |
| 99406998 | Calcium carbonate 500mg chewable tablets                                  |
| 97139998 | Calcium lactate 300mg tablets                                             |
| 94505997 | Calcium carbonate 2.5g granules sachets                                   |
| 92136979 | Calcium carbonate 1.25g effervescent tablets sugar free                   |
| 96899998 | Calcium carbonate 250mg tablets                                           |
| 96898998 | Calcium carbonate 500mg tablets                                           |
| 96604992 | Calcium lactate 250 mg tab                                                |
| 92143979 | Calcium carbonate 1.25g chewable tablets sugar free                       |
| 98318992 | Vitamin c500 calcium ascorbate 500 mg tab                                 |
| 99263990 | Calcium gluconate 600mg tablets                                           |
| 99041998 | Calcium carbonate 420mg tablets                                           |
| 96911998 | Calcium folinate 15mg tablets                                             |
| 93744998 | Calcium carbonate 420mg tablets                                           |
| 91474998 | Calcium carbonate 1.5g chewable tablets sugar free                        |
| 99754989 | Calcium lactate 300mg tablets                                             |
| 68498979 | Calcium folinate 15mg/5ml oral solution                                   |
| 87189998 | Calcium carbonate 500mg/5ml oral suspension                               |
| 96892998 | Calcium carbonate 500mg chewable tablets                                  |
| 62081979 | Calcium carbonate 300mg tablets                                           |
| 97050992 | Calcium lacto phosphate syr                                               |
| 95879992 | Calcium glubionate/calcium lactobionate eli                               |
| 97065992 | Calcium-sandoz 10 % inj                                                   |
| 96250992 | Calcium folinate 15mg tablets                                             |
| 95876992 | Calcium & vitamin c tab                                                   |
| 85866979 | Calcium carbonate 800mg chewable tablets                                  |
| 85874979 | Calcium carbonate 500mg chewable tablets                                  |
| 97072998 | Calcium gluconate 10% solution for injection 10ml ampoules                |
| 97051992 | Calcium lactate syr                                                       |
| 96138992 | Calcium gluconate 100 mg tab                                              |
| 98199990 | Calcium gluconate 600mg tablets                                           |
| 92148979 | Calcium carbonate 1.25g chewable tablets sugar free                       |
| 92157979 | Calcium gluconate 600mg tablets                                           |
| 93975992 | Calcium compound 400mg(10mmol) effervescent tablets                       |
| 87756998 | Calcium carbonate 120mg/ml suspension                                     |
| 55142978 | Calcium gluconate 544mg/5ml / calcium lactate 276mg/5ml oral solution     |
| 96556992 | Calcium extra                                                             |
| 97040992 | Calcium carbonate /carbonate mag /dolomi 720 mg pow                       |
| 85977998 | Calcium carbonate 1.25g effervescent tablets sugar free                   |
| 98875990 | Calcium lactate powder                                                    |

|          |                                                                                              |
|----------|----------------------------------------------------------------------------------------------|
| 91879998 | Calcium carbonate 500mg chewable tablets                                                     |
| 94591996 | Calcium carbonate 800mg chewable tablets                                                     |
| 94590998 | Calcium carbonate 1.25g chewable tablets sugar free                                          |
| 88867998 | Calcium carbonate 1.25g chewable tablets                                                     |
| 97074992 | Calcium orotate 500 mg tab                                                                   |
| 94590997 | Calcium carbonate 1.25g chewable tablets sugar free                                          |
| 89463998 | Calcium carbonate 800mg with magnesium hydroxide 165mg with 10mg famotidine tablets          |
| 96901998 | Calcium glubionate 1.09g/5ml / calcium lactobionate 727mg/5ml oral solution                  |
| 94757992 | Calcium carbonate/peppermint oil 500 mg tab                                                  |
| 96896997 | Calcium lactate gluconate 2.263g / Calcium carbonate 1.75g effervescent tablets sugar free   |
| 89815998 | Calcium folinate 15mg tablets                                                                |
| 94591997 | Calcium carbonate 2.5g chewable tablets sugar free                                           |
| 62944979 | Calcium 600mg chewable tablets                                                               |
| 90092998 | Calcium carbonate with magnesium carbonate with sodium alginate oral suspension              |
| 92146979 | Calcium carbonate 1.25g chewable tablets sugar free                                          |
| 94505998 | Calcium carbonate 1.25g granules                                                             |
| 80901979 | Calcium carbonate 250mg/5ml oral suspension                                                  |
| 94504998 | Calcium carbonate 1.26g/sachet granules                                                      |
| 93614998 | Calcium carbonate 1.25g effervescent tablets sugar free                                      |
| 98652998 | Calcium glubionate & calcium lactobionate 1.09g+723mg/5ml syrup                              |
| 99158997 | Calcium lactate gluconate 2.263g / Calcium carbonate 1.75g effervescent tablets sugar free   |
| 98011990 | Calcium folinate 15mg tablets                                                                |
| 85867979 | Calcium carbonate 800mg chewable tablets                                                     |
| 99261990 | Calcium lactate 300mg tablets                                                                |
| 85870998 | Calcium carbonate 500mg chewable tablets                                                     |
| 97057992 | Calcium gluconate 5 ml inj                                                                   |
| 97054992 | Calcium lactate 1 gm tab                                                                     |
| 97140998 | Calcium gluconate 600mg tablets                                                              |
| 93293998 | Calcium carbonate magnesium carbonate, magnesium trisilicate with sodium bicarbonate tablets |
| 96896998 | Calcium lactate gluconate 930.8mg / calcium carbonate 700mg effervescent tablets sugar free  |
| 92659998 | Calcium carbonate 500mg chewable tablets                                                     |
| 93289998 | Calcium carbonate 500mg chewable tablets                                                     |
| 94090992 | Calcium lactate gluconate 3.08 gm tab                                                        |
| 83421998 | Calcium carbonate 2.5g chewable tablets sugar free                                           |
| 96898997 | Calcium carbonate 1.25g tablets                                                              |
| 81836979 | Calcium carbonate 166.67mg tablets                                                           |
| 83456998 | Calcium compound 400mg(10mmol) effervescent tablets                                          |
| 94591998 | Calcium carbonate 1.25g tablets                                                              |
| 93478998 | Calcium carbonate 1.25g tablets                                                              |
| 55143978 | Calcium gluconate 544mg/5ml / calcium lactate 276mg/5ml oral solution                        |
| 99631998 | Calcium carbonate 1.25g chewable tablets sugar free                                          |

|          |                                                                                                                   |
|----------|-------------------------------------------------------------------------------------------------------------------|
| 98329998 | Calcium folinate 15mg tablets                                                                                     |
| 96913998 | Calcium folinate 15mg tablets                                                                                     |
| 80906979 | Calcium carbonate 600mg/5ml oral suspension                                                                       |
| 82105998 | Calcium carbonate 250mg dispersible tablets                                                                       |
| 96141992 | Calcium / magnesium aminocholate 500 mg tab                                                                       |
| 96959998 | Colecalciferol 200unit / Calcium carbonate 1.25g chewable tablets                                                 |
| 88225998 | Calcium carbonate 600mg with vitamin d and 5 micrograms tablets                                                   |
| 92000979 | Colecalciferol 200unit / Calcium carbonate 1.25g chewable tablets                                                 |
| 82967998 | Calcium lactate gluconate with calcium carbonate and colecalciferol 600mg calcium with 400iu effervescent tablets |
| 91990979 | Colecalciferol 400unit / Calcium carbonate 1.25g chewable tablets                                                 |
| 24205978 | Colecalciferol 200unit / calcium phosphate 250mg chewable tablets                                                 |
| 91996979 | Colecalciferol 400unit / Calcium carbonate 1.25g chewable tablets                                                 |
| 91526998 | Calcium carbonate 600mg with vitamin d and 5 micrograms tablets                                                   |
| 91998979 | Colecalciferol 200unit / Calcium carbonate 1.25g chewable tablets                                                 |
| 34027978 | Colecalciferol 1,000unit / calcium carbonate 2.5g chewable tablets                                                |
| 97248990 | Calcium and ergocalciferol tablets                                                                                |
| 60544979 | Colecalciferol 100unit / calcium carbonate 400mg chewable tablets                                                 |
| 68757978 | Colecalciferol 880unit / Calcium carbonate 2.5g chewable tablets                                                  |
| 52015979 | Colecalciferol 800unit / Calcium carbonate 1.25g chewable tablets                                                 |
| 98581990 | Colecalciferol 100unit / Calcium carbonate 400mg tablets                                                          |
| 64223979 | Calcium carbonate 400mg / ergocalciferol 2.5microgram tablets                                                     |
| 82215998 | Colecalciferol 400unit / Calcium carbonate 1.5g chewable tablets                                                  |
| 56948978 | Colecalciferol 880unit / Calcium carbonate 2.5g chewable tablets                                                  |
| 91987979 | Colecalciferol 400unit / Calcium carbonate 1.5g chewable tablets                                                  |
| 94756992 | Calcium & vitamin d 6000 i/u tab                                                                                  |
| 84292998 | Colecalciferol 400unit / Calcium carbonate 1.5g chewable tablets                                                  |
| 84287998 | Colecalciferol 400unit / Calcium carbonate 1.5g chewable tablets                                                  |
| 96959997 | Colecalciferol 400unit / Calcium carbonate 1.5g chewable tablets                                                  |
| 82966998 | Generic sandocal+d 600 effervescent tablets                                                                       |
| 96897998 | Colecalciferol 100unit / Calcium carbonate 400mg tablets                                                          |
| 91993979 | Colecalciferol 400unit / Calcium carbonate 1.25g chewable tablets                                                 |
| 99018990 | Colecalciferol 100unit / Calcium carbonate 400mg tablets                                                          |
| 52016979 | Colecalciferol 800unit / calcium carbonate 1.25g tablets                                                          |
| 34026978 | Colecalciferol 1,000unit / calcium carbonate 2.5g chewable tablets                                                |
| 97780990 | Colecalciferol 100unit / Calcium carbonate 400mg tablets                                                          |
| 81268998 | Colecalciferol 200unit / Calcium carbonate 750mg tablets                                                          |
| 96959996 | Colecalciferol 440unit / Calcium carbonate 1.25g effervescent granules sachets                                    |
| 97138998 | Colecalciferol 100unit / Calcium carbonate 400mg tablets                                                          |
| 81655998 | Colecalciferol 800unit / Calcium carbonate 1.25g chewable tablets                                                 |
| 82214998 | Colecalciferol 400unit / Calcium carbonate 1.25g tablets                                                          |
| 97064992 | Calcium 500mgs & vitamin d 200iu i/u tab                                                                          |
| 82344998 | Colecalciferol 400unit / Calcium carbonate 1.5g tablets                                                           |
| 97031992 | Calciferol/calcium gluconate tab                                                                                  |
| 83420998 | Colecalciferol 400unit / Calcium carbonate 1.25g chewable tablets                                                 |
| 91053998 | Colecalciferol 800unit / Calcium phosphate 3.1g oral powder sachets                                               |

|          |                                                                                                                    |
|----------|--------------------------------------------------------------------------------------------------------------------|
| 96789998 | Colecalciferol 100unit / Calcium carbonate 400mg tablets                                                           |
| 81191998 | Colecalciferol 400unit / Calcium carbonate 1.5g tablets                                                            |
| 64830979 | Colecalciferol 100unit / Calcium carbonate 400mg tablets                                                           |
| 91997979 | Colecalciferol 400unit / Calcium carbonate 1.25g chewable tablets                                                  |
| 81269998 | Colecalciferol 200unit / Calcium carbonate 750mg tablets                                                           |
| 96920998 | Colecalciferol 800unit / Calcium phosphate 3.1g oral powder sachets                                                |
| 97815990 | Colecalciferol 100unit / Calcium carbonate 400mg tablets                                                           |
| 82753998 | Calcium lactate gluconate with calcium carbonate and colecalciferol 1200mg calcium with 800iu effervescent tablets |
| 89637998 | Colecalciferol 400unit / Calcium carbonate 1.5g chewable tablets                                                   |
| 84286998 | Colecalciferol 400unit / Calcium carbonate 1.5g effervescent tablets                                               |
| 88144997 | Calcium carbonate 600mg with vitamin d % micrograms with minerals chewable tablets                                 |
| 68756978 | Colecalciferol 880unit / Calcium carbonate 2.5g chewable tablets                                                   |
| 91995979 | Colecalciferol 200unit / Calcium carbonate 1.25g chewable tablets                                                  |
| 94021990 | Colecalciferol 100unit / Calcium carbonate 400mg tablets                                                           |
| 89439998 | Colecalciferol 440unit / Calcium carbonate 1.25g effervescent granules sachets                                     |
| 96020992 | Colecalciferol 100unit / Calcium carbonate 400mg tablets                                                           |
| 82429979 | Colecalciferol 400unit / Calcium carbonate 1.5g chewable tablets                                                   |
| 98700998 | Colecalciferol 200unit / Calcium carbonate 1.25g chewable tablets                                                  |
| 64224979 | Calcium carbonate 400mg / ergocalciferol 2.5microgram tablets                                                      |
| 91994979 | Colecalciferol 400unit / Calcium carbonate 1.25g chewable tablets                                                  |
| 98700997 | Colecalciferol 200unit / Calcium carbonate 1.25g chewable tablets                                                  |
| 60543979 | Colecalciferol 100unit / calcium carbonate 400mg chewable tablets                                                  |
| 92004979 | Colecalciferol 100unit / Calcium carbonate 400mg tablets                                                           |
| 82546978 | Colecalciferol 400unit / calcium carbonate 1.5g chewable tablets                                                   |
| 88144998 | Calcium carbonate 600mg with vitamin d and minerals 5 micrograms tablets                                           |
| 82752998 | Generic sandocal+d 1200 effervescent tablets                                                                       |
| 89183998 | Colecalciferol 400unit / Calcium carbonate 1.25g chewable tablets                                                  |
| 98249990 | Colecalciferol 100unit / Calcium carbonate 400mg tablets                                                           |
| 73598978 | Colecalciferol 100unit / calcium carbonate 400mg tablets                                                           |
| 91989979 | Colecalciferol 400unit / Calcium carbonate 1.25g chewable tablets                                                  |
| 89828998 | Calcium carbonate 600mg with vitamin d and minerals 5 micrograms tablets                                           |
| 80849998 | Calcium carbonate 400mg with Colecalciferol 100 units chewable tablets                                             |
| 56947978 | Colecalciferol 800unit / Calcium carbonate 2.5g chewable tablets                                                   |
| 91991979 | Colecalciferol 400unit / Calcium carbonate 1.25g chewable tablets                                                  |
| 64831979 | Colecalciferol 100unit / calcium carbonate 400mg tablets                                                           |
| 93127992 | Calcium 500mgs & vitamin d 400iu tab                                                                               |
| 82483998 | Colecalciferol 400unit / Calcium carbonate 1.5g chewable tablets                                                   |
| 92001979 | Colecalciferol 200unit / Calcium carbonate 1.25g chewable tablets                                                  |
| 81656998 | Colecalciferol 800unit / calcium carbonate 1.25g chewable tablets                                                  |
| 92195998 | Calcium carbonate with multivitamins with minerals tablets                                                         |
| 89647998 | Colecalciferol 400unit / Calcium carbonate 1.5g chewable tablets                                                   |
| 96737998 | Calciferol with calcium tablets                                                                                    |

| Drug Code | Iron                                                           |
|-----------|----------------------------------------------------------------|
| 99203990  | Ferrous gluconate 300mg tablets                                |
| 62641979  | Ferrous citrate 62mg tablets                                   |
| 86992998  | Generic Ironorm syrup                                          |
| 85730998  | Ferrous sulphate liquid                                        |
| 96539997  | Ferrous succinate 106mg/5ml elixir                             |
| 83011998  | Ferrous fumarate 210mg tablets                                 |
| 94123997  | Polysaccharide-iron complex 100mg/5ml oral solution sugar free |
| 96538996  | Ferrous sulfate 125mg/ml oral drops sugar free                 |
| 96547998  | Ferrous fumarate 305mg tablet                                  |
| 98105998  | Ferrous glycine sulfate 100mg modified release tablets         |
| 96540998  | Ferrous succinate 100mg tablet                                 |
| 91632998  | Iron dextran 100mg/2ml solution for injection ampoules         |
| 94123996  | Polysaccharide-iron complex 100mg/5ml oral solution sugar free |
| 32137978  | Ferric maltol (iron 30mg) capsules                             |
| 97755989  | Ferrous sulfate 200mg tablets                                  |
| 83740998  | Ferric carboxymaltose 100mg/2ml solution for injection vials   |
| 93906990  | Ferrous sulfate 200mg tablets                                  |
| 83849998  | Iron dextran 500mg/10ml solution for injection ampoules        |
| 96538997  | Ferrous sulfate 325mg modified-release tablets                 |
| 96545990  | Ferrous gluconate 300mg tablets                                |
| 97997998  | Ferrous sulfate heptahydrate 60mg/5ml oral solution paediatric |
| 92330979  | Ferrous sulfate 200mg tablets                                  |
| 93322992  | Ferrous glycine sulphate s/r 562.5 mg tab                      |
| 96545998  | Ferrous fumarate 304mg tablets                                 |
| 55573979  | Ferrous fumarate 210mg tablets                                 |
| 90870998  | Ferrous sulfate 200mg tablets                                  |
| 98100998  | Ferrous glycine sulfate syrup                                  |
| 93873992  | Ferrous sulphate co tab                                        |
| 68196979  | Ferrous sulfate 300mg/5ml oral solution                        |
| 67758979  | Ferrous sulfate 50mg/5ml oral solution                         |
| 81900998  | Iron isomaltoside 1000 100mg/1ml solution for injection vials  |
| 96546997  | Ferrous fumarate 140mg/5ml oral solution sugar free            |
| 93851998  | Iron dextran 100mg/2ml solution for injection ampoules         |
| 99642997  | Ferrous fumarate 140mg/5ml oral solution                       |
| 96539998  | Ferrous succinate 100mg tablets                                |
| 96945990  | Ferrous sulfate 200mg tablets                                  |
| 94122998  | Polysaccharide iron complex capsules                           |
| 83010998  | Ferrous fumarate 140mg/5ml oral solution                       |
| 97278998  | Sodium feredetate 190mg/5ml oral solution sugar free           |
| 99599989  | Ferric ammonium citrate mixture                                |
| 96239992  | Ferrous gluconate 50 mg tab                                    |
| 83484998  | Polysaccharide-iron complex 100mg/5ml oral solution sugar free |
| 96544996  | Ferrous glycine sulphate tablet                                |
| 96451990  | Ferrous gluconate 300mg tablets                                |

|          |                                                                          |
|----------|--------------------------------------------------------------------------|
| 96548997 | Ferrous fumarate 210mg tablets                                           |
| 78172978 | Ferrous fumarate 210mg tablets                                           |
| 94125996 | Polysaccharide-iron complex 100mg/5ml oral solution sugar free           |
| 97429992 | Ferrous glycine sulphate 114 mg eli                                      |
| 98791990 | Ferrous gluconate 300mg tablets                                          |
| 95342990 | Ferrous sulfate 200mg tablets                                            |
| 79892978 | Iron isomaltoside 1000 100mg/2ml solution for injection ampoules         |
| 99643998 | Ferrous fumarate 322mg tablets                                           |
| 96544997 | Ferrous glycine sulphate tablet                                          |
| 90768997 | Ferrous fumarate 140mg/5ml oral solution                                 |
| 90768998 | Ferrous fumarate 322mg tablets                                           |
| 96547996 | Ferrous fumarate 305mg capsules                                          |
| 97607992 | Iron 100 mcg tab                                                         |
| 97998997 | Ferrous sulphate 300mg tablet                                            |
| 94125997 | Polysaccharide - iron complex capsules                                   |
| 96240992 | Ferrous gluconate 200mg tablets                                          |
| 62640979 | Ferrous citrate 62mg tablets                                             |
| 75907978 | Ferric carboxymaltose 1g/20ml solution for injection vials               |
| 97433992 | Ferrous gluconate 60 mg tab                                              |
| 81082998 | Ferrous sulfate heptahydrate 60mg/5ml oral solution paediatric           |
| 93900992 | Ferrous glycine sulfate 225mg tablets                                    |
| 94047998 | Ferrous sulfate 325mg / Ascorbic acid 500mg modified-release tablets     |
| 99661998 | Iron sucrose 100mg/5ml solution for injection vials                      |
| 81824998 | Ferrous sulfate 800microgram / silica 320microgram tablets               |
| 32136978 | Ferric maltol (iron 30mg) capsules                                       |
| 98165990 | Ferrous sulfate 200mg tablets                                            |
| 96542998 | Ferrous glycine sulphate capsule                                         |
| 97755990 | Ferrous sulfate 200mg tablets                                            |
| 97441992 | Ferrous sulphate 50 mg tab                                               |
| 98962998 | Polysaccharide-iron complex 100mg/5ml oral solution sugar free           |
| 96538998 | Ferrous sulfate 150mg modified-release capsules                          |
| 93871992 | Ferrous succinate 100mg tablets                                          |
| 93301992 | Ferrous fumarate 100 mg cap                                              |
| 97425992 | Ferrous phosphate co syr                                                 |
| 96237992 | Ferrous sulphate 100 mg tab                                              |
| 96537998 | Ferrous sulfate 125mg/ml oral drops sugar free                           |
| 83739998 | Ferric carboxymaltose 100mg/2ml solution for injection vials             |
| 98164990 | Ferrous gluconate 300mg tablets                                          |
| 96691992 | Iron 50 mg tab                                                           |
| 99596990 | Ferrous sulfate 200mg tablets                                            |
| 97998998 | Ferrous sulfate 200mg tablets                                            |
| 99645998 | Ferrous sulfate 325mg / Folic acid 350microgram modified-release tablets |
| 96548998 | Ferrous fumarate 290mg capsule                                           |
| 80109979 | Ferrous sulfate 200mg/5ml oral suspension                                |
| 95289998 | Sodium feredetate 190mg/5ml oral solution sugar free                     |
| 94123998 | Polysaccharide - iron complex tablet                                     |

|          |                                                                                                        |
|----------|--------------------------------------------------------------------------------------------------------|
| 93842998 | Iron sorbitol 100mg/2ml solution for injection ampoules                                                |
| 97128998 | Ferrous sulfate 325mg modified-release tablets                                                         |
| 81825998 | Ferrous sulfate 800microgram / silica 320microgram tablets                                             |
| 96546996 | Ferrous fumarate 305mg capsules                                                                        |
| 96234992 | Ferric & ammonium citrate 40 mg syr                                                                    |
| 97432992 | Ferrous gluconate/ascorbic acid tab                                                                    |
| 91608998 | Iron dextran 100mg/2ml solution for injection ampoules                                                 |
| 92339990 | Ferrous sulfate 200mg tablets                                                                          |
| 83736998 | Ferric carboxymaltose 500mg/10ml solution for injection vials                                          |
| 80111979 | Ferrous sulfate 200mg/5ml oral solution                                                                |
| 80101979 | Ferrous sulfate 625mg/5ml oral suspension                                                              |
| 96547997 | Ferrous fumarate 140mg/5ml oral solution                                                               |
| 94124998 | Ferrous fumarate 330mg modified release capsules                                                       |
| 96540997 | Ferrous succinate 106mg/5ml liquid                                                                     |
| 96548996 | Ferrous fumarate 304mg tablet                                                                          |
| 97614992 | Ironorm 100 mg inj                                                                                     |
| 97233998 | Ferrous sulphate compound tablet                                                                       |
| 99654998 | Ferrous sulphate with low dose folic acid, ascorbic acid and b group vitamins modified-release capsule |
| 96243992 | Ferrous sulphate 50 mg syr                                                                             |
| 96546998 | Ferrous fumarate 290mg capsules                                                                        |
| 96543998 | Ferrous glycine sulfate 141mg/5ml oral solution                                                        |
| 97421992 | Ferrous gluconate 600 mg tab                                                                           |
| 99980992 | Iron syr                                                                                               |
| 99595990 | Ferrous sulfate 200mg tablets                                                                          |
| 94351990 | Ferrous sulfate 200mg tablets                                                                          |
| 99648998 | Ferrous sulfate 150mg modified-release capsules                                                        |
| 93740992 | Ferrous gluconate 100 mg tab                                                                           |
| 96544998 | Ferrous glycine sulphate capsule                                                                       |
| 97439992 | Ferrous sulphate 250 mg tab                                                                            |
| 93097990 | Ferrous sulfate 200mg tablets                                                                          |
| 97321998 | Ferrous sulfate 160mg modified release tablets                                                         |
| 68190979 | Ferrous sulfate 45mg/5ml oral solution                                                                 |
| 96244992 | Ferrous sulphate 45 mg syr                                                                             |
| 99647998 | Ferrous gluconate 300mg tablets                                                                        |
| 79893978 | Iron isomaltoside 1000 100mg/2ml solution for injection ampoules                                       |
| 81823998 | Ferrous sulfate 4mg / silica 1.6mg tablets                                                             |
| 55572979 | Ferrous fumarate 140mg/5ml oral solution                                                               |
| 83737998 | Ferric carboxymaltose 500mg/10ml solution for injection vials                                          |
| 99522998 | Iron sorbitol injection                                                                                |
| 99646998 | Ferrous sulfate 325mg / Ascorbic acid 500mg modified-release tablets                                   |
| 97919992 | Polysaccharide-iron complex 50 mg tab                                                                  |
| 99642998 | Ferrous fumarate 210mg tablets                                                                         |
| 95021992 | Ferrous sulphate 200 mg cap                                                                            |
| 97438992 | Ferrous sulphate 150 mg tab                                                                            |
| 99633998 | Ferrous fumarate & folic acid 308mg+350mcg tablets                                                     |

|          |                                                                                           |
|----------|-------------------------------------------------------------------------------------------|
| 85186978 | Ferrous fumarate 140mg/5ml oral solution                                                  |
| 81124998 | Ferrous sulfate heptahydrate 60mg/5ml oral solution paediatric                            |
| 99632998 | Ferrous sulphate with high dose folic acid and minerals tablet                            |
| 68214979 | Ferrous sulfate 140mg/5ml oral solution                                                   |
| 93321992 | Ferrous succinate /folic acid /succinic 106 mg tab                                        |
| 64515979 | Ferrous gluconate 130mg capsules                                                          |
| 97440992 | Ferrous sulphate 100 mg cap                                                               |
| 86994998 | Generic Ironorm capsules                                                                  |
| 93872998 | Ferrous sulfate 160mg modified-release tablets                                            |
| 81898998 | Iron isomaltoside 1000 1g/10ml solution for injection vials                               |
| 97234998 | Ferrous gluconate 300mg tablets                                                           |
| 83850998 | Iron dextran 500mg/10ml solution for injection ampoules                                   |
| 75906978 | Ferric carboxymaltose 1g/20ml solution for injection vials                                |
| 99538998 | Iron dextran 50mg/ml injection                                                            |
| 81899998 | Iron isomaltoside 1000 500mg/5ml solution for injection vials                             |
| 98842990 | Ferrous sulfate heptahydrate powder                                                       |
| 96072992 | Ferrous sulphate, dried s/r 160 mg tab                                                    |
| 97436992 | Ferrous sulph dried 270mg/folic ac.500mcg mg cap                                          |
| 86322998 | Ferric ammonium citrate 400mg/5ml / folic acid 500micrograms/5ml oral solution sugar free |
| 86323998 | Ferric ammonium citrate 400mg/5ml / folic acid 2.5mg/5ml oral solution sugar free         |
| 99726996 | Ferrous sulfate 160mg / folic acid 400microgram modified-release tablets                  |
| 96238992 | Ferrous gluconate/folic acid 250 mg tab                                                   |
| 95011992 | Fe-cap folic cap                                                                          |
| 94712998 | Ferrous gluconate with high dose folic acid 30mg with 5mg tablet                          |
| 94052998 | Ferrous fumarate & folic acid 330mg+350mcg modified release capsules                      |
| 97320998 | Ferrous sulfate & folic acid 160mg+400mcg modified release tablets                        |
| 97434992 | Ferrous sulfate 325mg / Folic acid 350microgram modified-release tablets                  |
| 92612998 | Ferrous sulfate 150mg / folic acid 500microgram modified-release capsules                 |
| 94657992 | Ascorbic acid /ferrous sulphate /folic a 500 mg tab                                       |
| 97427992 | Ferrous glycine sulphate/folic acid mg cap                                                |
| 99222998 | Ferrous sulphate with low dose folic acid and multivitamins tablet                        |
| 94054998 | Ferrous gluconate, folic acid, ascorbic acid 250mg+4mg+10mg tablets                       |
| 97437992 | Ferrous sulfate 325mg / Folic acid 350microgram modified-release tablets                  |
| 95849992 | Folic acid 2.5mg/5ml-with iron 80mg/5ml syr                                               |
| 99223998 | Ferrous fumarate 322mg / Folic acid 350microgram tablets                                  |
| 98104998 | Ferrous glycine sulphate with low dose folic acid modified-release tablet                 |
| 96241992 | Ferrous sulph dried 194mg/folic ac. 1.7mg mg tab                                          |
| 94053998 | Ferrous fumarate & folic acid 100mg + 400mcg tablets                                      |
| 95919992 | Folic acid + iron tab                                                                     |
| 97423992 | Ferrous fumarate 120mg/folic acid 200mcg 120 mg tab                                       |
| 97422992 | Ferrous fumar.100mg/folic acid350mcg s/r 100 mg tab                                       |
| 97426992 | Ferrous glycine sulphate/folic acid s/r mg tab                                            |
| 96872992 | Folic acid 0.5mg/5ml-with iron 80mg/5ml syr                                               |
| 99726998 | Ferrous sulfate 150mg / folic acid 500microgram modified-release capsules                 |
| 96236992 | Ferrous fumar.330mg/folic acid350mcg s/r 330 mg cap                                       |

|          |                                                                                                  |
|----------|--------------------------------------------------------------------------------------------------|
| 90996998 | Ferrous fumarate with low dose folic acid 100mg with 400micrograms tablet                        |
| 98579998 | Ferrous sulfate 150mg / Folic acid 500microgram modified-release capsules                        |
| 93219992 | Iron 100mg/folic acid 350mcg tab                                                                 |
| 97477996 | Ferrous fumarate 305mg / Folic acid 350microgram capsules                                        |
| 94051998 | Ferrous fumarate 305mg / Folic acid 350microgram capsules                                        |
| 97477997 | Ferrous fumarate 322mg / Folic acid 350microgram tablets                                         |
| 97435992 | Ferrous sulph,dried 150mg/folic ac.500mcg mg cap                                                 |
| 97468998 | Ferric ammonium citrate 400mg/5ml / folic acid 500micrograms/5ml oral solution sugar free        |
| 97431992 | Ferrous gluconate, folic acid, ascorbic acid 250mg+4mg+10mg tablets                              |
| 97478998 | Ferrous glycine sulphate with low dose folic acid modified-release tablet                        |
| 95016992 | Ferrous gluconate, folic acid, ascorbic acid 250mg+4mg+10mg tablets                              |
| 94049998 | Ferric ammonium citrate & folic acid 80mg+2.5mg/5ml syrup                                        |
| 97324998 | Ferric ammonium citrate 400mg/5ml / folic acid 2.5mg/5ml oral solution sugar free                |
| 97477998 | Ferrous fumarate with low dose folic acid 330mgwith350microgram modified-release capsule         |
| 99726997 | Ferrous sulfate 325mg / Folic acid 350microgram modified-release tablets                         |
| 92612998 | Ferrous sulfate 150mg / folic acid 500microgram modified-release capsules                        |
| 97424992 | Ferrous fumarate 290mg/folic acid 350mcg mg cap                                                  |
| 94048998 | Ferric ammonium citrate & folic acid 80mg+500mcg/5ml syrup                                       |
| 97430992 | Ferrous gluconate/thiamine hcl tab                                                               |
| 96656992 | Ferrous fumarate 330mg/thiamine hcl 5mg 330 mg cap                                               |
| 95917992 | Ferrous gluconate/thiamine hcl eli                                                               |
| 96242992 | Ferrous sulphate/thiamine 150 mg cap                                                             |
| 97927998 | Ferrous sulphate with zinc sulphate, ascorbic acid and b group vitamins modified-release capsule |
| 97928998 | Ferrous sulphate with zinc sulphate modified-release capsule                                     |
| 97929998 | Ferrous sulphate with low dose folic acid and zinc sulphate modified-release tablet              |

| <b>DrugCodes</b> | <b>Vitamin B12</b>                                           |
|------------------|--------------------------------------------------------------|
| 46386978         | Cyanocobalamin 50microgram tablets                           |
| 93025990         | Hydroxocobalamin 1mg/1ml solution for injection ampoules     |
| 99796997         | Cyanocobalamin 35micrograms/5ml oral solution                |
| 24258978         | Cyanocobalamin 100microgram tablets                          |
| 81895998         | Hydroxocobalamin 2.5g powder for solution for infusion vials |
| 97177992         | Cobalin-h 250 mcg inj                                        |
| 81613979         | Cyanocobalamin 1mg modified-release tablets                  |
| 97221992         | Cyanocobalamin 60 ml inj                                     |
| 96621992         | Hydroxocobalamin 1mg/1ml solution for injection ampoules     |
| 96195998         | Hydroxocobalamin 250microgram/ml injection                   |
| 62305979         | Cyanocobalamin 1mg sublingual tablets sugar free             |
| 92321979         | Hydroxocobalamin 1mg/1ml solution for injection ampoules     |
| 72798978         | Hydroxocobalamin 10mg/2ml solution for injection ampoules    |
| 99796998         | Cyanocobalamin 50microgram tablets                           |
| 93233998         | Hydroxocobalamin 250mcg/1ml injection                        |
| 96600998         | Cyanocobalamin 50microgram tablets                           |

|          |                                                            |
|----------|------------------------------------------------------------|
| 81612979 | Cyanocobalamin 1mg modified-release tablets                |
| 72686978 | Cyanocobalamin 35micrograms/5ml oral solution              |
| 96599996 | Cyanocobalamin 500micrograms/ml injection                  |
| 24259978 | Cyanocobalamin 100microgram tablets                        |
| 73018978 | Mecobalamin 1mg capsules                                   |
| 38628978 | Cyanocobalamin 35micrograms/5ml oral solution              |
| 96143990 | Hydroxocobalamin 1mg/1ml solution for injection ampoules   |
| 95309992 | Hydroxocobalamin 250mcg/1ml injection                      |
| 96599997 | Cyanocobalamin 50micrograms/ml injection                   |
| 99370998 | Hydroxocobalamin 1mg/1ml solution for injection ampoules   |
| 81020998 | Hydroxocobalamin 5g powder for solution for infusion vials |
| 82224998 | Hydroxocobalamin 1mg/1ml solution for injection ampoules   |
| 54614979 | Cyanocobalamin 1mg tablets                                 |
| 92324979 | Hydroxocobalamin 1mg/1ml solution for injection ampoules   |
| 99820998 | Hydroxocobalamin 1mg/1ml solution for injection ampoules   |
| 97217992 | Cyanocobalamin 250 250 mcg inj                             |
| 51478978 | Cyanocobalamin 1mg tablets                                 |
| 96195997 | Hydroxocobalamin 1mg/1ml solution for injection ampoules   |
| 96599998 | Cyanocobalamin 1mg/1ml solution for injection ampoules     |
| 99795998 | Cyanocobalamin 1mg/1ml solution for injection ampoules     |
| 96530992 | Vitamin b12 1000 mcg tab                                   |
| 97084990 | Hydroxocobalamin 1mg/1ml solution for injection ampoules   |
| 94884992 | Cytamen 250 inj                                            |
| 96600997 | Cyanocobalamin 35micrograms/5ml oral solution              |
| 93839992 | Ce-cobalin syr                                             |

| <b>DrugCodes</b> | <b>Vitamin D</b>                                                |
|------------------|-----------------------------------------------------------------|
| 53368979         | Colecalciferol 10,000unit capsules                              |
| 53461978         | Ergocalciferol 12.5microgram tablets                            |
| 97767998         | Calciferol bp 3000units/ml solution                             |
| 54917979         | Colecalciferol 800unit tablets                                  |
| 78426978         | Colecalciferol 2,200unit tablets                                |
| 82956978         | Colecalciferol 20,000unit capsules                              |
| 86615979         | Ergocalciferol 300,000units/1ml solution for injection ampoules |
| 30274978         | Colecalciferol 400unit tablets                                  |
| 55055979         | Colecalciferol 2,200unit tablets                                |
| 34138978         | Colecalciferol 800unit capsules                                 |
| 53091979         | Colecalciferol 15,000units/5ml oral solution                    |
| 55054979         | Colecalciferol 20,000unit tablets                               |
| 55065979         | Colecalciferol 20,000units/ml oral solution sugar free          |
| 32317978         | Colecalciferol 50,000unit capsules                              |
| 81012998         | Colecalciferol 2,500unit capsules                               |
| 53353979         | Colecalciferol 5,000unit tablets                                |
| 97034992         | Calciferol 400 i/u inj                                          |
| 99763988         | Ergocalciferol 250microgram tablets                             |

|          |                                                                            |
|----------|----------------------------------------------------------------------------|
| 98374992 | Vitamin d2 tab                                                             |
| 57965979 | Colecalciferol 20,000unit capsules                                         |
| 81009998 | Colecalciferol 10,000unit capsules                                         |
| 84414978 | Ergocalciferol 1,500units/ml oral solution sugar free                      |
| 97036992 | Calciferol 1,000 iu/5ml sol                                                |
| 60566979 | Vitamin D2 3,000units/ml oral solution sugar free                          |
| 81014998 | Colecalciferol 1,000unit capsules                                          |
| 78388978 | Colecalciferol 500unit orodispersible tablets sugar free                   |
| 77093978 | Colecalciferol 15,000units/5ml oral solution                               |
| 69920979 | Colecalciferol 1,000units/5ml oral suspension                              |
| 83469978 | Colecalciferol 10,000unit tablets                                          |
| 62626979 | Colecalciferol 1,000unit capsules                                          |
| 29742978 | Colecalciferol 800unit capsules                                            |
| 73012978 | Colecalciferol 25,000units/1ml oral solution unit dose ampoules sugar free |
| 54891979 | Colecalciferol 2,000units/ml oral solution                                 |
| 78390978 | Colecalciferol 2,000unit orodispersible tablets sugar free                 |
| 60056979 | Ergocalciferol 300,000units/1ml solution for injection ampoules            |
| 73102978 | Colecalciferol 3,200unit capsules                                          |
| 95877992 | Calciferol 40,000 iu/ml inj                                                |
| 79340978 | Ergocalciferol 10,000units/5ml oral solution                               |
| 73391978 | Colecalciferol 3,200unit capsules                                          |
| 62357979 | Ergocalciferol 12.5microgram tablets                                       |
| 28752978 | Colecalciferol 400unit tablets                                             |
| 55060979 | Colecalciferol 5,000unit tablets                                           |
| 83468978 | Colecalciferol 20,000unit tablets                                          |
| 80887998 | Colecalciferol 20,000units/ml oral solution sugar free                     |
| 55257978 | Colecalciferol 20,000unit capsules                                         |
| 80159979 | Ergocalciferol 3,000units/5ml oral suspension                              |
| 78387978 | Colecalciferol 500unit orodispersible tablets sugar free                   |
| 39355978 | Colecalciferol 50,000units/1ml oral solution unit dose ampoules sugar free |
| 53092979 | Colecalciferol 15,000units/5ml oral solution                               |
| 94809990 | Ergocalciferol 1.25mg tablets                                              |
| 80883998 | Colecalciferol 3,000units/ml oral solution sugar free                      |
| 95875992 | Calciferol soln 400u/5ml in arachis oil sol                                |
| 83744978 | Colecalciferol 5,000units/5ml oral solution                                |
| 53650979 | Ergocalciferol 1.25mg capsules                                             |
| 93163990 | Ergocalciferol 600,000units/2ml solution for injection ampoules            |
| 84680998 | Colecalciferol oral liquid                                                 |
| 73301978 | Colecalciferol 20,000units/ml oral solution                                |
| 81568998 | Colecalciferol 10000units/ml oral solution                                 |
| 81612998 | Colecalciferol 1,000unit tablets                                           |
| 59772979 | Colecalciferol 400units/dose oral spray sugar free                         |
| 53362979 | Colecalciferol 400unit capsules                                            |
| 69915979 | Colecalciferol 400units/5ml oral suspension                                |
| 79993978 | Colecalciferol 20,000unit tablets                                          |
| 96036992 | Vitamin b complex & iron liq                                               |

|          |                                                                            |
|----------|----------------------------------------------------------------------------|
| 53359979 | Ergocalciferol 12.5microgram tablets                                       |
| 53377978 | Colecalciferol 2,400units/ml oral drops sugar free                         |
| 97033992 | Calciferol drops liq                                                       |
| 80022978 | Colecalciferol 20,000unit capsules                                         |
| 81007998 | Colecalciferol 30,000unit capsules                                         |
| 39354978 | Colecalciferol 50,000units/1ml oral solution unit dose ampoules sugar free |
| 68781978 | Colecalciferol 20,000unit capsules                                         |
| 60568979 | Ergocalciferol 20,000units/ml oral solution sugar free                     |
| 81252998 | Colecalciferol 1,000unit tablets                                           |
| 61592979 | Colecalciferol 2,000units/ml oral drops sugar free                         |
| 98422998 | Ergocalciferol 3,000units/ml oral solution                                 |
| 56242979 | Colecalciferol 3,000unit tablets                                           |
| 80157979 | Ergocalciferol 30,000units/5ml oral suspension                             |
| 38846978 | Colecalciferol 20,000unit tablets                                          |
| 80169979 | Ergocalciferol 10,000units/5ml oral suspension                             |
| 34135978 | Colecalciferol 3,000unit tablets                                           |
| 52154979 | Colecalciferol 20,000unit capsules                                         |
| 68780978 | Colecalciferol 20,000unit capsules                                         |
| 62088979 | Colecalciferol 10,000units/ml oral solution                                |
| 55195978 | Colecalciferol 10,000units/ml oral solution                                |
| 28480978 | Colecalciferol 400unit capsules                                            |
| 62645979 | Colecalciferol 2,200unit capsules                                          |
| 53355979 | Colecalciferol 400unit tablets                                             |
| 59771979 | Colecalciferol 400units/dose oral spray sugar free                         |
| 96131992 | Calciferol 400 iu/ml i/u syr                                               |
| 53356979 | Colecalciferol 30,000unit capsules                                         |
| 81328998 | Colecalciferol 800unit capsules                                            |
| 85224998 | Ergocalciferol 300,000units/1ml solution for injection ampoules            |
| 56950978 | Colecalciferol 25,000unit tablets                                          |
| 73128978 | Colecalciferol 10,000unit capsules                                         |
| 63201979 | Colecalciferol 2,000unit capsules                                          |
| 81004998 | Colecalciferol 30,000unit capsules                                         |
| 62643979 | Colecalciferol 600unit capsules                                            |
| 82283998 | Colecalciferol 15,000units/5ml oral solution                               |
| 84592978 | Colecalciferol 400unit tablets                                             |
| 59843979 | Colecalciferol 20,000unit capsules                                         |
| 55078979 | Colecalciferol 50,000unit capsules                                         |
| 53370979 | Colecalciferol 20,000unit capsules                                         |
| 62324979 | Colecalciferol 20,000units/ml oral drops                                   |
| 53090979 | Colecalciferol 15,000units/5ml oral solution                               |
| 58769979 | Colecalciferol 2,000units/ml oral solution sugar free                      |
| 26002978 | Colecalciferol 800unit capsules                                            |
| 60373979 | Fultium-D3 800unit capsules                                                |
| 81631998 | Colecalciferol 2,200unit capsules                                          |
| 97032992 | Calciferol 300 iu/ml i/u syr                                               |
| 60594979 | Colecalciferol 1,000unit tablets                                           |

|          |                                                                   |
|----------|-------------------------------------------------------------------|
| 61911979 | Colecalciferol 400unit tablets                                    |
| 83743978 | Ergocalciferol 1,000units/5ml oral solution                       |
| 70249978 | Ergocalciferol 1.25mg capsules                                    |
| 59527978 | Colecalciferol 5,000unit tablets                                  |
| 81074998 | Colecalciferol 5,000unit capsules                                 |
| 97023992 | Calciferol 100,000 iu/ml inj                                      |
| 61563979 | Colecalciferol 30,000units/5ml oral solution                      |
| 58355979 | Colecalciferol 20,000unit capsules                                |
| 97037992 | Calciferol 300 mg tab                                             |
| 54637979 | Colecalciferol 500unit capsules                                   |
| 79322978 | Colecalciferol 200units/drop oral drops sugar free                |
| 78719978 | Colecalciferol 2,000unit tablets                                  |
| 54638979 | Colecalciferol 500unit capsules                                   |
| 62356979 | Ergocalciferol 12.5microgram tablets                              |
| 80153979 | Ergocalciferol 50,000units/5ml oral suspension                    |
| 79960978 | Colecalciferol 280unit chewable tablets                           |
| 60224979 | Colecalciferol 300,000units/1ml solution for injection ampoules   |
| 47465978 | Colecalciferol 2,740units/ml oral drops sugar free                |
| 59769979 | Colecalciferol 800units/ml oral drops sugar free                  |
| 58139979 | Colecalciferol 5,000unit tablets                                  |
| 59525978 | Colecalciferol 40,000unit capsules                                |
| 56313979 | Colecalciferol 1,000unit tablets                                  |
| 82946978 | Colecalciferol 20,000unit tablets                                 |
| 59522978 | Colecalciferol 2,000unit tablets                                  |
| 58768979 | Colecalciferol 2,000units/ml oral solution sugar free             |
| 81013998 | Colecalciferol 1,000unit capsules                                 |
| 80885998 | Colecalciferol 3,000units/ml oral solution sugar free             |
| 56246979 | Colecalciferol 2,200unit tablets                                  |
| 99762990 | Ergocalciferol 250microgram tablets                               |
| 56310979 | Colecalciferol 400unit tablets                                    |
| 78389978 | Colecalciferol 2,000unit orodispersible tablets sugar free        |
| 55064979 | Colecalciferol 3,000units/ml oral solution sugar free             |
| 56244979 | Colecalciferol 20,000unit tablets                                 |
| 62152979 | Colecalciferol 6,000units/5ml oral suspension                     |
| 85005998 | Ergocalciferol oral liquid                                        |
| 62087979 | Colecalciferol 10,000units/ml oral solution                       |
| 55066979 | Colecalciferol 30,000unit capsules                                |
| 83480978 | Colecalciferol 800unit capsules                                   |
| 53322979 | Ergocalciferol 125microgram tablets                               |
| 84586978 | Colecalciferol 20,000unit tablets                                 |
| 97238989 | Ergocalciferol 1.25mg tablets                                     |
| 30212978 | Colecalciferol 2,500units/drop oral drops sugar free              |
| 68396979 | Ergocalciferol 100,000units/5ml oral solution                     |
| 95606992 | Ergocalciferol 600,000units/1.5ml solution for injection ampoules |
| 59770979 | Colecalciferol 800units/ml oral drops sugar free                  |
| 55197978 | Colecalciferol 10,000units/ml oral solution                       |

|          |                                                                 |
|----------|-----------------------------------------------------------------|
| 57024978 | Colecalciferol 1,000unit tablets                                |
| 55077979 | Colecalciferol 20,000unit capsules                              |
| 61594979 | Colecalciferol 150unit / calcium 250mg tablets                  |
| 64131979 | Colecalciferol 4,000units/5ml oral suspension                   |
| 55074979 | Colecalciferol 2,200unit capsules                               |
| 83748978 | Colecalciferol 10,000units/5ml oral solution                    |
| 93401992 | Calciferol 5000 i/u tab                                         |
| 56248979 | Colecalciferol 10,000unit tablets                               |
| 54890979 | Colecalciferol 2,000units/ml oral solution                      |
| 78720978 | Colecalciferol 2,000unit tablets                                |
| 86614979 | Ergocalciferol 300,000units/1ml solution for injection ampoules |
| 62116979 | Colecalciferol 5,000unit capsules                               |
| 51018978 | Colecalciferol 15,000units/5ml oral solution                    |
| 93164990 | Ergocalciferol 300,000units/1ml solution for injection ampoules |
| 51473978 | Colecalciferol 200units/drop oral drops sugar free              |
| 30643978 | Colecalciferol 800unit capsules                                 |
| 80947998 | Ergocalciferol 20,000units/ml oral solution sugar free          |
| 94810990 | Ergocalciferol 250microgram tablets                             |
| 53089979 | Colecalciferol 15,000units/5ml oral solution                    |
| 52074979 | Colecalciferol 40,000unit capsules                              |
| 60572979 | Colecalciferol 20,000units/ml oral solution sugar free          |
| 95872992 | Calciferol 3,000 iu tab                                         |
| 81253998 | Colecalciferol 1,000unit tablets                                |
| 97035992 | Calciferol 9,000 iu/ml liq                                      |
| 55070979 | Colecalciferol 400unit capsules                                 |
| 34144978 | Colecalciferol 1,000unit capsules                               |
| 53357979 | Colecalciferol 5,000unit capsules                               |
| 96133992 | Calciferol 1 mg cap                                             |
| 93384992 | Calciferol 10 mcg tab                                           |
| 98421998 | Ergocalciferol 250microgram tablets                             |
| 53358979 | Colecalciferol 3,000unit capsules                               |
| 96022992 | Vitamins a/d/c drops liq                                        |
| 55194978 | Colecalciferol 10,000units/ml oral solution sugar free          |
| 96132992 | Calciferol .25 mg cap                                           |
| 97238990 | Ergocalciferol 250microgram tablets                             |
| 54916979 | Colecalciferol 800unit tablets                                  |
| 60225979 | Ergocalciferol 300,000units/1ml solution for injection ampoules |
| 96134992 | Calciferol 1,000 iu i/u cap                                     |
| 53321979 | Ergocalciferol 125microgram tablets                             |
| 32267978 | Colecalciferol 1,000unit tablets                                |
| 84072978 | Colecalciferol 5,000unit tablets                                |
| 55061979 | Ergocalciferol 3,000units/ml oral solution                      |
| 80914998 | Colecalciferol 2,000units/ml oral drops sugar free              |
| 28467978 | Colecalciferol 2,740units/ml oral drops sugar free              |
| 81335998 | Colecalciferol 20,000unit capsules                              |
| 68384979 | Ergocalciferol 20,000units/5ml oral solution                    |

|          |                                                       |
|----------|-------------------------------------------------------|
| 84600978 | Colecalciferol 1,000unit tablets                      |
| 96600992 | Ergocalciferol 250microgram tablets                   |
| 58349979 | Colecalciferol 5,000unit capsules                     |
| 32265978 | Colecalciferol 4,000unit capsules                     |
| 83393978 | Colecalciferol 50,000unit tablets                     |
| 53367979 | Colecalciferol 2,200unit capsules                     |
| 59528978 | Colecalciferol 20,000unit capsules                    |
| 79338978 | Ergocalciferol 6,000units/5ml oral solution           |
| 93390992 | Calciferol 1,000 iu i/u tab                           |
| 48011978 | Colecalciferol 15,000units/5ml oral solution          |
| 78441978 | Colecalciferol 1,000unit capsules                     |
| 73392978 | Colecalciferol 3,200unit capsules                     |
| 68382979 | Ergocalciferol 20,000units/5ml oral suspension        |
| 83750978 | Colecalciferol 10,000units/5ml oral solution          |
| 83392978 | Colecalciferol 50,000unit tablets                     |
| 81011998 | Colecalciferol 2,500unit capsules                     |
| 58346979 | Colecalciferol 800unit capsules                       |
| 32236978 | Colecalciferol 4,000unit tablets                      |
| 53464978 | Colecalciferol 20,000unit capsules                    |
| 55072979 | Colecalciferol 1,000unit capsules                     |
| 53352979 | Colecalciferol 20,000unit tablets                     |
| 54889979 | Colecalciferol 3,000units/ml oral solution            |
| 80952998 | Colecalciferol 800unit capsules                       |
| 52073979 | Colecalciferol 40,000unit capsules                    |
| 79321978 | Colecalciferol 200units/drop oral drops sugar free    |
| 55062979 | Ergocalciferol 3,000units/ml oral solution sugar free |
| 80151979 | Ergocalciferol 6,000units/5ml oral suspension         |
| 73129978 | Colecalciferol 20,000unit capsules                    |
| 56123979 | Ergocalciferol 1.25mg capsules                        |
| 55056979 | Colecalciferol 10,000unit tablets                     |
| 98421997 | Ergocalciferol 1.25mg tablets                         |
| 68364979 | Ergocalciferol 400units/5ml oral solution             |
| 97038992 | Calciferol 15 mcg tab                                 |
| 80016978 | Colecalciferol 400unit capsules                       |
| 58209979 | Ergocalciferol 3,000units/ml oral solution            |
| 55068979 | Colecalciferol 5,000unit capsules                     |
| 68392979 | Ergocalciferol 120units/5ml oral solution             |
| 62536979 | Colecalciferol 400unit capsules                       |
| 53641979 | Ergocalciferol 250microgram tablets                   |
| 55196978 | Colecalciferol 10,000units/ml oral drops sugar free   |
| 82514998 | Ergocalciferol 1.25mg capsules                        |
| 81329998 | Colecalciferol 800unit capsules                       |
| 80147979 | Ergocalciferol 800units/5ml oral suspension           |
| 69917979 | Colecalciferol 20,000units/5ml oral suspension        |
| 30582978 | Colecalciferol 40,000unit tablets                     |
| 32237978 | Colecalciferol 4,000unit tablets                      |

|          |                                                                   |
|----------|-------------------------------------------------------------------|
| 96788998 | Ergocalciferol 40000units/ml oral solution                        |
| 79961978 | Colecalciferol 280unit chewable tablets                           |
| 60374979 | Colecalciferol 800unit capsules                                   |
| 85329978 | Colecalciferol 1,000unit tablets                                  |
| 53369979 | Colecalciferol 20,000unit capsules                                |
| 55053979 | Colecalciferol 3,000unit tablets                                  |
| 62002979 | Colecalciferol 1,000units/ml oral solution                        |
| 56949978 | Colecalciferol 25,000unit tablets                                 |
| 55079979 | Colecalciferol 50,000unit capsules                                |
| 53378978 | Colecalciferol 2,400units/ml oral drops sugar free                |
| 81624998 | Colecalciferol 10,000units/5ml oral suspension                    |
| 81138998 | Colecalciferol 500 units tablets                                  |
| 53366979 | Colecalciferol 600unit capsules                                   |
| 51017978 | Colecalciferol 15,000units/5ml oral solution                      |
| 59981979 | Ergocalciferol 15,000units/5ml oral solution                      |
| 62622979 | Colecalciferol 1,000unit tablets                                  |
| 51484978 | Colecalciferol 1,000unit capsules                                 |
| 55067979 | Colecalciferol 30,000unit capsules                                |
| 62986979 | Colecalciferol 20,000unit capsules                                |
| 85220998 | Ergocalciferol 600,000units/2ml solution for injection ampoules   |
| 80019978 | Colecalciferol 1,000unit capsules                                 |
| 53371979 | Colecalciferol 50,000unit capsules                                |
| 72911978 | Colecalciferol 1,000unit capsules                                 |
| 98925998 | Ergocalciferol 600,000units/2ml solution for injection ampoules   |
| 61593979 | Colecalciferol 2,000units/ml oral drops sugar free                |
| 95878992 | Calciferol 400 iu/ml sol                                          |
| 28751978 | Colecalciferol 800unit tablets                                    |
| 61910979 | Colecalciferol 400unit tablets                                    |
| 81710998 | Colecalciferol 50,000unit capsules                                |
| 78428978 | Colecalciferol 5,000unit tablets                                  |
| 80886998 | Colecalciferol 20,000units/ml oral solution sugar free            |
| 83746978 | Colecalciferol 5,000units/5ml oral solution                       |
| 80915998 | Colecalciferol 2,000units/ml oral drops sugar free                |
| 95873992 | Calciferol 30,000 iu/ml inj                                       |
| 96037992 | Vitamin & iron tonic (epitone) liq                                |
| 55076979 | Colecalciferol 10,000unit capsules                                |
| 83747978 | Colecalciferol 10,000units/5ml oral solution                      |
| 54716979 | Colecalciferol 1,000unit capsules                                 |
| 79935978 | Ergocalciferol 600,000units/1.5ml solution for injection ampoules |
| 82513998 | Colecalciferol 20,000unit capsules                                |
| 84599978 | Colecalciferol 1,000unit tablets                                  |
| 98422997 | Ergocalciferol 1,000units/5ml oral suspension                     |
| 47464978 | Colecalciferol 2,740units/ml oral drops sugar free                |
| 54790979 | Ergocalciferol 1.25mg capsules                                    |
| 58353979 | Colecalciferol 1,000unit capsules                                 |
| 62001979 | Colecalciferol 1,000units/ml oral solution                        |

|          |                                                                                                                   |
|----------|-------------------------------------------------------------------------------------------------------------------|
| 81464998 | Colecalciferol 400unit capsules                                                                                   |
| 80018978 | Colecalciferol 1,000unit tablets                                                                                  |
| 97024992 | Calciferol 600,000 iu/ml inj                                                                                      |
| 81015998 | Colecalciferol 400unit capsules                                                                                   |
| 73011978 | Colecalciferol 25,000units/1ml oral solution unit dose ampoules sugar free                                        |
| 99763990 | Ergocalciferol 600,000units/2ml solution for injection ampoules                                                   |
| 81010998 | Colecalciferol 10,000unit capsules                                                                                |
| 53365979 | Colecalciferol 1,000unit capsules                                                                                 |
| 80416979 | Colecalciferol 15,000units/5ml oral suspension                                                                    |
| 96599992 | Calciferol 75 mcg inj                                                                                             |
| 58782979 | Colecalciferol 3,000units/ml oral solution sugar free                                                             |
| 62118979 | Colecalciferol 3,000unit capsules                                                                                 |
| 96601992 | Calciferol 20,000 iu cap                                                                                          |
| 55558979 | Ergocalciferol 50,000unit capsules                                                                                |
| 61595979 | Colecalciferol 150unit / calcium 250mg tablets                                                                    |
| 80958998 | Colecalciferol 20,000unit capsules                                                                                |
| 84362998 | Vitamins c & d3 with folic acid tablets                                                                           |
| 83639978 | Colecalciferol 1,000unit / folic acid 400microgram capsules                                                       |
| 83638978 | Colecalciferol 1,000unit / folic acid 400microgram capsules                                                       |
| 84363998 | Vitamins c & d3 with folic acid tablets                                                                           |
| 96959998 | Colecalciferol 200unit / Calcium carbonate 1.25g chewable tablets                                                 |
| 88225998 | Calcium carbonate 600mg with vitamin d and 5 micrograms tablets                                                   |
| 92000979 | Colecalciferol 200unit / Calcium carbonate 1.25g chewable tablets                                                 |
| 82967998 | Calcium lactate gluconate with calcium carbonate and colecalciferol 600mg calcium with 400iu effervescent tablets |
| 91990979 | Colecalciferol 400unit / Calcium carbonate 1.25g chewable tablets                                                 |
| 24205978 | Colecalciferol 200unit / calcium phosphate 250mg chewable tablets                                                 |
| 91996979 | Colecalciferol 400unit / Calcium carbonate 1.25g chewable tablets                                                 |
| 91526998 | Calcium carbonate 600mg with vitamin d and 5 micrograms tablets                                                   |
| 91998979 | Colecalciferol 200unit / Calcium carbonate 1.25g chewable tablets                                                 |
| 34027978 | Colecalciferol 1,000unit / calcium carbonate 2.5g chewable tablets                                                |
| 97248990 | Calcium and ergocalciferol tablets                                                                                |
| 60544979 | Colecalciferol 100unit / calcium carbonate 400mg chewable tablets                                                 |
| 68757978 | Colecalciferol 880unit / Calcium carbonate 2.5g chewable tablets                                                  |
| 52015979 | Colecalciferol 800unit / Calcium carbonate 1.25g chewable tablets                                                 |
| 98581990 | Colecalciferol 100unit / Calcium carbonate 400mg tablets                                                          |
| 64223979 | Calcium carbonate 400mg / ergocalciferol 2.5microgram tablets                                                     |
| 82215998 | Colecalciferol 400unit / Calcium carbonate 1.5g chewable tablets                                                  |
| 56948978 | Colecalciferol 880unit / Calcium carbonate 2.5g chewable tablets                                                  |
| 91987979 | Colecalciferol 400unit / Calcium carbonate 1.5g chewable tablets                                                  |
| 94756992 | Calcium & vitamin d 6000 i/u tab                                                                                  |
| 84292998 | Colecalciferol 400unit / Calcium carbonate 1.5g chewable tablets                                                  |
| 84287998 | Colecalciferol 400unit / Calcium carbonate 1.5g chewable tablets                                                  |
| 96959997 | Colecalciferol 400unit / Calcium carbonate 1.5g chewable tablets                                                  |
| 82966998 | Generic sandocal+d 600 effervescent tablets                                                                       |
| 96897998 | Colecalciferol 100unit / Calcium carbonate 400mg tablets                                                          |

|          |                                                                                                                    |
|----------|--------------------------------------------------------------------------------------------------------------------|
| 91993979 | Colecalciferol 400unit / Calcium carbonate 1.25g chewable tablets                                                  |
| 99018990 | Colecalciferol 100unit / Calcium carbonate 400mg tablets                                                           |
| 52016979 | Colecalciferol 800unit / calcium carbonate 1.25g tablets                                                           |
| 34026978 | Colecalciferol 1,000unit / calcium carbonate 2.5g chewable tablets                                                 |
| 97780990 | Colecalciferol 100unit / Calcium carbonate 400mg tablets                                                           |
| 81268998 | Colecalciferol 200unit / Calcium carbonate 750mg tablets                                                           |
| 96959996 | Colecalciferol 440unit / Calcium carbonate 1.25g effervescent granules sachets                                     |
| 97138998 | Colecalciferol 100unit / Calcium carbonate 400mg tablets                                                           |
| 81655998 | Colecalciferol 800unit / Calcium carbonate 1.25g chewable tablets                                                  |
| 82214998 | Colecalciferol 400unit / Calcium carbonate 1.25g tablets                                                           |
| 97064992 | Calcium 500mgs & vitamin d 200iu i/u tab                                                                           |
| 82344998 | Colecalciferol 400unit / Calcium carbonate 1.5g tablets                                                            |
| 97031992 | Calciferol/calcium gluconate tab                                                                                   |
| 83420998 | Colecalciferol 400unit / Calcium carbonate 1.25g chewable tablets                                                  |
| 91053998 | Colecalciferol 800unit / Calcium phosphate 3.1g oral powder sachets                                                |
| 96789998 | Colecalciferol 100unit / Calcium carbonate 400mg tablets                                                           |
| 81191998 | Colecalciferol 400unit / Calcium carbonate 1.5g tablets                                                            |
| 64830979 | Colecalciferol 100unit / Calcium carbonate 400mg tablets                                                           |
| 91997979 | Colecalciferol 400unit / Calcium carbonate 1.25g chewable tablets                                                  |
| 81269998 | Colecalciferol 200unit / Calcium carbonate 750mg tablets                                                           |
| 96920998 | Colecalciferol 800unit / Calcium phosphate 3.1g oral powder sachets                                                |
| 97815990 | Colecalciferol 100unit / Calcium carbonate 400mg tablets                                                           |
| 82753998 | Calcium lactate gluconate with calcium carbonate and colecalciferol 1200mg calcium with 800iu effervescent tablets |
| 89637998 | Colecalciferol 400unit / Calcium carbonate 1.5g chewable tablets                                                   |
| 84286998 | Colecalciferol 400unit / Calcium carbonate 1.5g effervescent tablets                                               |
| 88144997 | Calcium carbonate 600mg with vitamin d % micrograms with minerals chewable tablets                                 |
| 68756978 | Colecalciferol 880unit / Calcium carbonate 2.5g chewable tablets                                                   |
| 91995979 | Colecalciferol 200unit / Calcium carbonate 1.25g chewable tablets                                                  |
| 94021990 | Colecalciferol 100unit / Calcium carbonate 400mg tablets                                                           |
| 89439998 | Colecalciferol 440unit / Calcium carbonate 1.25g effervescent granules sachets                                     |
| 96020992 | Colecalciferol 100unit / Calcium carbonate 400mg tablets                                                           |
| 82429979 | Colecalciferol 400unit / Calcium carbonate 1.5g chewable tablets                                                   |
| 98700998 | Colecalciferol 200unit / Calcium carbonate 1.25g chewable tablets                                                  |
| 64224979 | Calcium carbonate 400mg / ergocalciferol 2.5microgram tablets                                                      |
| 91994979 | Colecalciferol 400unit / Calcium carbonate 1.25g chewable tablets                                                  |
| 98700997 | Colecalciferol 200unit / Calcium carbonate 1.25g chewable tablets                                                  |
| 60543979 | Colecalciferol 100unit / calcium carbonate 400mg chewable tablets                                                  |
| 92004979 | Colecalciferol 100unit / Calcium carbonate 400mg tablets                                                           |
| 82546978 | Colecalciferol 400unit / calcium carbonate 1.5g chewable tablets                                                   |
| 88144998 | Calcium carbonate 600mg with vitamin d and minerals 5 micrograms tablets                                           |
| 82752998 | Generic sandocal+d 1200 effervescent tablets                                                                       |
| 89183998 | Colecalciferol 400unit / Calcium carbonate 1.25g chewable tablets                                                  |
| 98249990 | Colecalciferol 100unit / Calcium carbonate 400mg tablets                                                           |
| 73598978 | Colecalciferol 100unit / calcium carbonate 400mg tablets                                                           |

|          |                                                                          |
|----------|--------------------------------------------------------------------------|
| 91989979 | Colecalciferol 400unit / Calcium carbonate 1.25g chewable tablets        |
| 89828998 | Calcium carbonate 600mg with vitamin d and minerals 5 micrograms tablets |
| 80849998 | Calcium carbonate 400mg with Colecalciferol 100 units chewable tablets   |
| 56947978 | Colecalciferol 800unit / Calcium carbonate 2.5g chewable tablets         |
| 91991979 | Colecalciferol 400unit / Calcium carbonate 1.25g chewable tablets        |
| 64831979 | Colecalciferol 100unit / calcium carbonate 400mg tablets                 |
| 93127992 | Calcium 500mgs & vitamin d 400iu tab                                     |
| 82483998 | Colecalciferol 400unit / Calcium carbonate 1.5g chewable tablets         |
| 92001979 | Colecalciferol 200unit / Calcium carbonate 1.25g chewable tablets        |
| 81656998 | Colecalciferol 800unit / calcium carbonate 1.25g chewable tablets        |
| 92195998 | Calcium carbonate with multivitamins with minerals tablets               |
| 89647998 | Colecalciferol 400unit / Calcium carbonate 1.5g chewable tablets         |
| 96737998 | Calciferol with calcium tablets                                          |
| 90112998 | Vitamins A and D capsules BPC 1973                                       |
| 92394998 | Vitamin a, c & d oral drops                                              |
| 89881998 | Vitamin c & a & d oral drops                                             |
| 93542992 | Vitamin c & a & d oral drops                                             |
| 92395998 | Vitamin a, c & d oral drops                                              |
